# Supplementary material for: Senotherapeutic drugs for human intervertebral disc degeneration and low back pain
Source: eLife. 2020 Aug 21;9:e54693. doi: 10.7554/eLife.54693 (PMC7442487; doi:10.7554/eLife.54693)
Supplement: Figure 1—figure supplement 1—source data 1. [file elife-54693-fig1-figsupp1-data1.xlsx]

## Sheet: Fig S1-A
	NP		AF
Average FLUORESCENCE (triplicate)	CTRL	RG-7112	CTRL	RG-7112		% DIFFERENCE RG-7112/CTRL	NP	AF
1	1541.67	101.47	1579.33	103.124		1	101.47	103.124
2	1238.67	101.184	1171	105.124		2	101.184	105.124
3	1190.33	109.213	1223.67	114.928		3	109.213	114.928
4	1337	108.975	1327.67	110.444		4	108.975	110.444
5	1351.67	117.707	1360.33	113.747		5	117.707	113.747
6	1328.67	120.672	1317	123.867		6	120.672	123.867
						MOYENNE	109.87	111.872	CTRL set at 100% for NP and AF in S1A graph
						STD	8.06641	7.49467
						N	6	6
						SEM	3.2931	3.05969

## Sheet: Fig S1-C
	Average percentage of Apoptotic cells (4 measures)	CTRL	RG-7112
	1	14.7971	26.6667
	2	12.5	28.866
	3	12.9555	21.3592
	average	13.4175	25.6306
	STD	1.21628	3.85913
	N (= 3 biological donors)	3	3
	SMEM	0.70222	2.22807

## Sheet: Fig S1-E
		ND				D
	Average (triplicate measure)	CTRL	RG-7112		Average (triplicate measure)	CTRL	RG-7112
	1	25017.3	24198.7		1	25506.3	26560
	2	26563.7	25218		2	25475.3	27927.3
	3	24191	23281		3	23703.7	25533.3
	4	23440	21780.3		4	21605.3	24348.3
	% DIFFERENCE in RG-7112/CTRL	ND			% DIFFERENCE in RG-7112/CTRL	D
	1	96.7276			1	104.131
	2	94.9342			2	109.625
	3	96.2383			3	107.719
	4	92.9195			4	112.696
	MOYENNE	95.2049			MOYENNE	108.543
	STD	1.70125			STD	3.58527
	N	4			N	4
	SEM	0.850626			SEM	1.79263

## Sheet: Fig S1-F
		ND				D
	Average FLUORESCENCE (triplicate measure)	CTRL	RG-7112		Average FLUORESCENCE (triplicate measure)	CTRL	RG-7112
	1	3236.67	3341		1	5806.33	5582.67
	2	4244.33	4097.67		2	3153.67	2994
	3	5459	5207.33		3	4678	4732.33
	4	4971.67	4827		4	4717	4649.67
	% DIFFERENCE in RG-7112/CTRL	ND			% DIFFERENCE in RG-7112/CTRL	D
	1	103.223			1	96.1479
	2	96.5444			2	94.9371
	3	95.3899			3	101.161
	4	97.0902			4	98.5725
	MOYENNE	98.062			MOYENNE	97.7047
	STD	3.51324			STD	2.75594
	N	4			N	4
	SEM	1.43428			SEM	1.12511

## Sheet: Fig S1-G
	NP
	sGAG (ug/mL)	1		2		3		4		5		6			NP				NP
	Days	CTRL	RG-7112	CTRL	RG-5	CTRL	RG-7112	CTRL	RG-5	CTRL	RG-5	CTRL	RG-5		Average	CTRL	RG-7112		% Difference/CTRL	RG-7112
	7	15.7736	15.762	33.0509	46.1356	25.8394	21.3491	11.3445	14.958	20.3411	22.4464	33.042	34.5891		7	23.2319	25.8734		7	11.3699
	10	11.9926	10.3804	22.7458	19.6723	15.6452	13.8046	12.1102	10.2334	16.345	18.6355	31.3944	31.2839		10	18.3722	17.335		10	-5.64533
	14	6.90327	8.81466	26.8588	19.3107	8.61651	11.1853	10.7843	10.028	14.8928	21.3645	26.4919	29.3249		14	15.7579	16.6714		14	5.79667
	17	5.61355	9.93969	29.0056	36.4633	8.16545	16.8083	11.3165	19.916	14.9708	23.8596	23.0962	33.3936		17	15.3614	23.3967		17	52.309
	21	4.5929	10.5892	28.5119	38.7797	8.20186	15.443	11.0551	22.0261	14.6784	25.6043	15.0693	34.2375		21	13.6849	24.4466		21	78.6394
																						% Difference RG-7112/CTRL	NP	AF
																						7	11.3699	2.78741
																						10	-5.64533	3.62426
																						14	5.79667	11.6038
	AF																					17	52.309	46.1078
	sGAG (ug/mL)	1		2		3		4		5		6			AF				AF			21	78.6394	101.911
	Days	CTRL	RG-7112	CTRL	RG-7112	CTRL	RG-7112	CTRL	RG-7112	CTRL	RG-7112	CTRL	RG-7112		Average	CTRL	RG-7112		% Difference/CTRL	RG-7112
	7	17.4221	18.1201	27.2316	25.5932	33.4547	26.6889	18.9076	20.7096	21.3158	25.848	23.468	28.7924		7	23.6333	24.292		7	2.78741
	10	23.9338	20.5967	23.7175	19.5254	21.248	22.4211	14.4164	16.3772	19.5322	18.4698	16.8274	26.6225		10	19.9459	20.6688		10	3.62426
	14	11.3788	14.1136	25.2316	22.7345	14.4215	14.3103	14.7152	14.9767	16.6569	20.1949	14.8885	22.2524		14	16.2154	18.097		14	11.6038
	17	12.1629	15.3567	26.8136	41.7401	14.8564	16.8083	14.239	18.8329	13.1092	21.0039	11.6837	21.9409		17	15.4775	22.6138		17	46.1078
	21	4.9149	12.2012	25.774	41.9096	7.0894	17.7994	14.1737	19.4958	9.31774	24.0253	7.826	24.0808		21	11.516	23.252		21	101.911
