# Supplementary material for: Senotherapeutic drugs for human intervertebral disc degeneration and low back pain
Source: eLife. 2020 Aug 21;9:e54693. doi: 10.7554/eLife.54693 (PMC7442487; doi:10.7554/eLife.54693)
Supplement: Figure 1—source data 1. [file elife-54693-fig1-data1.xlsx]

## Sheet: Figure  1B
	p16	Control								RG-7112
	NP	22.807	21.6216	22.069	28.1553	17.037	34.3434	15.3017	23.0384	24.0964	9.09091	9.42761	9.47368	3.42298	16.092	9.3305
	AF	28.934	38.0597	28.9062	22.069	22.7273	38.9655	29.6954	29.9144	16.1017	6.84931	11.1801	7.54258	10.274	10.7438	6.45161

## Sheet: Figure 1C
	Ki-67	Control								RG-7112
	NP	7.14286	19.2857	3.33333	17.341	10.8911	9.02111	20.6442	20.0594	47.0588	69.0244	40.7976	34.0206	7.98611	10.0694	29.2585	54.1121
	AF	28.7292	16.667	6.05096	19.7183	9.13242	5.20446	15.1013	25.084	68.6047	52.6316	70.7751	24.7233	41.1411	51.3109	45.5556	50.3261

## Sheet: Figure 1D
	Caspase-3	Control								RG-7112
	NP	4.25532	22.22	0.716846	17.437	26.087	3.64742	5.80913	26.0962	19.883	20	14.2415	15.2439	5.47945	9.00524	21.6582	24.344
	AF	11.3475	4.20168	6.11354	4.65116	16.4021	3.56704	22.7513	5.11811	30.7692	28.5714	46.4941	13.6986	10.9756	20.8	36.7725	29.1614
