# Supplementary material for: Senotherapeutic drugs for human intervertebral disc degeneration and low back pain
Source: eLife. 2020 Aug 21;9:e54693. doi: 10.7554/eLife.54693 (PMC7442487; doi:10.7554/eLife.54693)
Supplement: Figure 2—figure supplement 1—source data 1. [file elife-54693-fig2-figsupp1-data1.xlsx]

## Sheet: Figure S2-A
	Target Name	Fold change Average in O-Vanillin / CTRL	p value		Target Name	Fold change Average in RG-7112 / CTRL	p value		All Genes (Fold changes )	comment	CTRL					RG7112					O-Vanillin
	COL3A1-Hs00943809_m1	0.0241243	0.119285		FN1-Hs00365052_m1	0.00434029	0.488806		ABL1-Hs01104728_m1	ABL proto-oncogene 1, non-receptor tyrosine kinase	5.60027	5.12658	5.44866	5.31372	4.73191	6.14282	5.48935	5.90756	6.43828	4.7867	6.77019	6.87017	7.05939	6.79356	6.50624
	IGFBP3-Hs00365742_g1	0.0245117	0.253964		SOD2-Hs00167309_m1	0.0113211	0.899049		AKT1-Hs00178289_m1	AKT serine/threonine kinase 1	4.81513	5.10288	5.00453	4.41518	4.54172	5.02911	5.24807	5.19626	5.03163	4.63034	5.53338	5.68785	5.40973	5.04282	6.05523
	CALR-Hs00189032_m1	0.0305327	0.595177		VIM-Hs00185584_m1	0.0170538	0.647675		ALDH1A3-Hs00167476_m1	aldehyde dehydrogenase 1 family member A3	10.2002	9.25235	11.0919	10.5105	8.8501	10.2389	9.43335	11.2749	12.2141	8.86069	11.5	11.9259	11.0941	11.762	12.0816
	IGFBP7-Hs00266026_m1	0.0333064	0.72376		IGFBP3-Hs00365742_g1	0.0198846	0.665976		ATM-Hs01112355_g1	ATM serine/threonine kinase	8.13606	8.16695	7.77228	7.65395	8.10761	8.10855	8.25981	7.3552	7.60746	7.66912	7.92373	7.02912	8.06661	8.14463	7.36068
	SPARC-Hs00234160_m1	0.0490014	0.851548		CALR-Hs00189032_m1	0.0250965	0.10989		BMI1-Hs00995536_m1	BMI1 proto-oncogene, polycomb ring finger	6.47366	5.79718	4.98454	6.06305	5.95912	6.57231	6.62775	5.53592	6.03679	6.17131	6.15661	5.30507	6.47163	6.45518	5.35788
	HSP90AA1-Hs00743767_sH	0.0509231	0.745989		CD44-Hs01075861_m1	0.0267819	0.987157		CALR-Hs00189032_m1	calreticulin	0.255119	0.272043	0.113357	-0.0539055	-0.116318	-0.0883045	0.194191	-0.214605	-0.173224	-0.265192	0.310518	-0.25622	0.484829	0.517719	-0.100775
	HIF1A-Hs00153153_m1	0.06857	0.219955		IGFBP7-Hs00266026_m1	0.0420777	0.947936		CCNA2-Hs00996788_m1	cyclin A2	6.77852	7.01148	4.93748	6.51911	6.68317	7.17234	8.09254	6.59139	6.56816	7.30135	5.71796	4.0287	4.97418	5.1746	4.26436
	SOD1-Hs00533490_m1	0.159658	0.972407		COL3A1-Hs00943809_m1	0.0466068	0.652019		CCNB1-Hs01030099_m1	cyclin B1	6.19107	6.30054	5.14436	5.87717	6.25849	6.60098	7.20924	7.05313	6.30127	6.69079	5.69376	3.56217	4.85498	5.04934	3.50598
	CITED2-Hs01897804_s1	0.165003	0.216478		HIF1A-Hs00153153_m1	0.0533061	0.747794		CCND1-Hs00765553_m1	cyclin D1	3.4281	3.39152	4.18534	3.1301	3.02492	3.40772	3.35068	3.96965	4.17766	2.94459	5.08761	5.64177	4.98113	4.00726	5.27456
	IL6-Hs00174131_m1	0.171439	0.710533		SPARC-Hs00234160_m1	0.055387	0.968579		CCNE1-Hs01026536_m1	cyclin E1	8.64745	7.88582	8.52597	7.51935	7.23883	8.52537	8.75425	9.46288	8.37245	8.09699	8.14527	8.08804	8.67122	7.95776	8.26795
	COL1A1-Hs00164004_m1	0.186048	0.255593		HSP90AA1-Hs00743767_sH	0.0560662	0.903797		CD44-Hs01075861_m1	CD44 molecule (Indian blood group)	0.0762691	0.315569	0.312565	-0.531727	-0.449057	0.0368328	0.605188	0.169308	-0.541424	-0.522638	1.03605	0.488356	0.722738	0.436367	0.441856
	ID1-Hs03676575_s1	0.199541	0.937302		THBS1-Hs00962908_m1	0.0745538	0.432624		CDC25C-Hs00156411_m1	cell division cycle 25C	10.9355	11.8295	10.7892	11.3462	11.9784	12.0086	12.7185	12.0752	11.5952	12.0686	9.94273	8.57414	9.66146	9.22363	9.6268
	PCNA-Hs00427214_g1	0.223385	0.107749		CEBPB-Hs00942496_s1	0.137323	0.504241		CDK2-Hs01548894_m1	cyclin dependent kinase 2	7.15729	7.37504	7.28915	6.6791	6.90992	7.42925	7.69817	7.71916	7.48858	7.03384	7.51368	6.95658	7.36372	6.92833	8.05608
	CEBPB-Hs00942496_s1	0.273201	0.388586		IL6-Hs00174131_m1	0.155299	0.903973		CDK4-Hs01565683_g1	cyclin dependent kinase 4	4.64163	4.12946	4.90584	3.996	4.05662	4.57295	4.68911	4.7966	4.33656	4.25294	3.92115	3.48353	4.36927	4.24708	3.96373
	CDK4-Hs01565683_g1	0.434053	0.179506		SERPINE1-Hs01126606_m1	0.163177	0.848188		CDK6-Hs01026371_m1	cyclin dependent kinase 6	5.02628	4.80875	5.17617	4.02733	4.40971	5.06146	5.19595	5.20175	4.39093	4.35358	5.51978	5.2971	5.91406	5.45451	5.35208
	SERPINE1-Hs01126606_m1	0.443499	0.0644238		COL1A1-Hs00164004_m1	0.163847	0.468753		CDKN1B-Hs01597588_m1	cyclin dependent kinase inhibitor 1B	8.57462	8.60695	7.64651	8.19183	8.49335	8.67305	8.95631	7.40817	7.7166	8.19722	8.01364	6.82084	7.77905	8.38806	7.16252
	CREG1-Hs00355412_m1	0.506755	0.890009		SOD1-Hs00533490_m1	0.18527	0.96702		CDKN1C-Hs00175938_m1	cyclin dependent kinase inhibitor 1C	12.2091	11.8804	12.667	13.5818	12.2737	13.0346	12.3676	12.0815	13.7405	11.8886	12.4908	11.6512	12.9895	12.4563	11.8059
	CDKN1A-Hs00355782_m1	0.783578	0.313523		PCNA-Hs00427214_g1	0.229258	0.0680976		CDKN2A-Hs00923894_m1	cyclin dependent kinase inhibitor 2A	6.6701	7.06692	6.00818	5.48615	6.91373	6.44328	7.72521	5.84556	4.89713	7.33505	5.15634	4.54293	4.47222	5.60597	4.49041
	MDM2-Hs01066930_m1	0.815917	0.496983		CCND1-Hs00765553_m1	0.322844	0.65941		CDKN2B-Hs00793225_m1	cyclin dependent kinase inhibitor 2B	6.41251	6.98224	8.17596	6.07392	6.24679	6.54718	6.9022	6.97488	7.22792	6.26667	7.79393	8.79991	7.5664	6.88923	8.30551
	GSK3B-Hs01047719_m1	1.07699	0.905942		PLAU-Hs01547054_m1	0.331036	0.682536		CDKN2C-Hs00176227_m1	cyclin dependent kinase inhibitor 2C	8.31265	8.54497	7.57674	7.7838	8.5005	8.73401	9.58784	8.4408	8.03687	9.56149	7.40801	5.90628	6.78757	6.8739	6.71054
	IGF1R-Hs00609566_m1	1.55546	0.876913		TGFB1-Hs00998133_m1	0.345435	0.355062		CDKN2D-Hs00176481_m1	cyclin dependent kinase inhibitor 2D	7.88413	8.02666	7.81545	7.82313	7.85689	8.23758	8.18503	8.33003	8.77059	8.29309	8.94354	8.787	8.45845	8.42586	9.24116
	BMI1-Hs00995536_m1	1.67672	0.798902		CITED2-Hs01897804_s1	0.350727	0.868421		CHEK1-Hs00967506_m1	checkpoint kinase 1	6.76868	6.46351	6.15389	5.83547	6.52062	6.44141	6.96166	6.44811	5.72497	6.49875	6.04947	4.68722	5.64112	5.85369	5.25393
	MORC3-Hs00899726_m1	1.7326	0.334395		ID1-Hs03676575_s1	0.395966	0.198869		CHEK2-Hs00200485_m1	checkpoint kinase 2	11.5335	11.2686	10.2415	10.988	10.8734	11.5338	11.5287	10.4104	10.804	11.8732	10.7098	8.98893	10.7628	10.7996	9.65532
	MAP2K1-Hs00983247_g1	2.08429	0.855847		BCL2L1-Hs00236329_m1	0.461364	0.0582994		CITED2-Hs01897804_s1	Cbp/p300 interacting transactivator with Glu/Asp rich carboxy-terminal domain 2	3.9577	4.26231	2.193	2.46195	3.49291	3.55848	4.942	2.41699	1.23581	3.57789	2.95575	1.21694	2.77267	3.7676	1.40485
	GLB1-Hs01035168_m1	2.17295	0.142358		CREG1-Hs00355412_m1	0.514175	0.982492		COL1A1-Hs00164004_m1	collagen type I alpha 1	1.99194	2.08134	3.49022	1.32777	2.08866	2.36883	2.13925	3.60938	2.74482	1.88162	1.91333	2.84216	2.7278	3.11079	2.8874
	TP53-Hs01034249_m1	2.29979	0.16202		CDK4-Hs01565683_g1	0.618177	0.403128		COL3A1-Hs00943809_m1	collagen type III alpha 1 chain	1.15103	0.440525	0.283638	0.871271	0.557764	1.17331	1.15648	0.305264	0.733145	0.484467	-0.177984	-1.38403	0.846813	0.773096	-2.36913
	MYC-Hs00153408_m1	2.50902	0.0621116		ETS1-Hs00428293_m1	0.735078	0.570344		CREG1-Hs00355412_m1	cellular repressor of E1A stimulated genes 1	4.45714	4.10771	3.7968	4.33648	4.26317	4.28791	4.75985	3.84581	3.79953	4.24461	4.3257	3.61727	4.65295	5.18784	2.87806
	RB1-Hs01078066_m1	2.70236	0.394831		CDK6-Hs01026371_m1	0.775422	0.610591		E2F1-Hs00153451_m1	E2F transcription factor 1	7.33467	8.08496	8.11771	7.76476	7.54823	8.15009	8.45167	9.44644	9.45056	8.05865	8.30476	8.3469	8.45378	7.28272	9.47517
	SIRT1-Hs01009005_m1	2.76929	0.273404		AKT1-Hs00178289_m1	0.870969	0.178615		E2F3-Hs00605457_m1	E2F transcription factor 3	7.10676	7.16279	7.38647	6.55854	6.77847	7.32421	7.49001	7.74941	6.85586	7.0855	7.43155	6.83737	7.63458	7.61991	7.08232
	PTEN-Hs02621230_s1	2.79875	0.683617		MAP2K3-Hs00177127_m1	0.909692	0.384511		EGR1-Hs00152928_m1	early growth response 1	7.28312	7.64378	7.71176	6.14734	7.0454	7.61085	7.84851	8.03677	6.80645	7.39255	9.40494	8.62734	9.72405	8.47215	7.57236
	TWIST1-Hs01675818_s1	3.04909	0.767845		GSK3B-Hs01047719_m1	1.02818	0.808768		ETS1-Hs00428293_m1	ETS proto-oncogene 1, transcription factor	4.64568	4.36497	5.32474	4.05967	4.3385	4.78146	4.83577	5.60304	4.34322	4.14933	5.32287	5.53	5.56539	6.03847	5.26225
	NBN-Hs01039836_m1	3.29209	0.296064		HRAS-Hs00978050_g1	1.06771	0.406721		ETS2-Hs00232009_m1	ETS proto-oncogene 2, transcription factor	8.63285	8.69703	8.62724	8.8908	8.38868	8.77157	9.28605	8.91105	9.14174	8.50036	9.71383	10.2553	9.44568	10.1583	9.33238
	PIK3CA-Hs00907957_m1	3.30209	0.55577		NFKB1-Hs00765730_m1	1.17457	0.450999		FN1-Hs00365052_m1	fibronectin 1	-3.0221	-2.52438	-2.13419	-3.43368	-3.10427	-2.92158	-2.26329	-2.52479	-2.51957	-3.01516	-1.73659	-0.933855	-1.14228	-0.674183	-1.26236
	ING1-Hs01941057_u1	3.66925	0.506152		IRF3-Hs01547283_m1	1.29462	0.325561		GLB1-Hs01035168_m1	galactosidase beta 1	5.89968	5.92492	6.59482	5.57556	5.82988	6.10087	6.49114	6.57407	5.95906	5.88289	6.0397	6.0699	6.60888	6.69522	6.18895
	TP53BP1-Hs00996818_m1	3.9526	0.216849		MORC3-Hs00899726_m1	1.33085	0.705915		GSK3B-Hs01047719_m1	glycogen synthase kinase 3 beta	5.51396	5.28122	5.78595	4.88116	4.95859	5.36404	5.72869	5.26285	4.75856	5.01202	5.29526	4.87354	5.50131	5.50409	5.37178
	E2F3-Hs00605457_m1	4.2855	0.17144		ABL1-Hs01104728_m1	1.4672	0.154936		HRAS-Hs00978050_g1	HRas proto-oncogene, GTPase	5.86228	5.43187	5.36756	5.20928	5.37445	5.58608	5.77695	4.87139	4.9538	5.14261	5.99863	5.72212	5.92331	5.67893	5.92635
	CDK2-Hs01548894_m1	4.83429	0.280465		TGFB1I1-Hs00210887_m1	1.60223	0.599583		ID1-Hs03676575_s1	inhibitor of DNA binding 1, HLH protein	3.67928	3.01512	1.74701	3.17096	2.65322	4.53598	4.30331	2.12368	3.11482	4.03962	4.08353	2.68191	2.89863	2.90888	1.47984
	CDKN1B-Hs01597588_m1	5.48138	0.0816086		MYC-Hs00153408_m1	1.60972	0.240054		IGF1-Hs01547656_m1	insulin like growth factor 1	11.6101	9.28618	9.32721	11.1864	11.2394	12.2486	10.0768	9.57081	11.1944	11.0681	9.86002	8.72174	10.0276	11.5407	6.75525
	RBL2-Hs00180562_m1	5.53362	0.220979		IGF1R-Hs00609566_m1	1.77416	0.532204		IGF1R-Hs00609566_m1	insulin like growth factor 1 receptor	6.01687	6.00099	5.17854	5.76863	5.9541	6.19412	6.42066	5.2035	5.8282	6.13088	5.35999	5.85915	5.97086	6.00401	5.88206
	ATM-Hs01112355_g1	5.63659	0.309837		GLB1-Hs01035168_m1	1.99123	0.312897		IGFBP3-Hs00365742_g1	insulin like growth factor binding protein 3	-0.527615	-0.694595	0.208246	-0.647007	-1.29715	-0.498056	-0.32008	0.181618	-0.320763	-1.25216	-0.707481	-0.539324	0.550995	0.00928116	-0.261803
	RBL1-Hs00765700_m1	6.05494	0.068613		BMI1-Hs00995536_m1	2.04349	0.321228		IGFBP5-Hs00181213_m1	insulin like growth factor binding protein 5	9.44871	9.44504	9.45059	9.97173	9.43593	9.9504	9.54975	9.64549	10.9553	9.51513	10.4757	10.0552	9.40416	11.4336	9.21725
	CDKN2B-Hs00793225_m1	7.3118	0.0607971		TP53-Hs01034249_m1	2.18046	0.245246		IGFBP7-Hs00266026_m1	insulin like growth factor binding protein 7	1.08912	0.687664	-0.383329	0.160931	0.616445	0.858993	1.30786	-0.371378	-0.638287	0.859476	0.896837	-0.237816	1.0202	0.530722	-0.833847
	CCNE1-Hs01026536_m1	8.16204	0.408224		MAP2K1-Hs00983247_g1	2.30752	0.580503		ING1-Hs01941057_u1	inhibitor of growth family member 1	7.27653	6.78006	6.18127	6.93475	6.83543	7.29133	7.35284	6.28261	6.16225	6.98816	7.54457	6.44254	7.34019	7.8033	6.15502
	E2F1-Hs00153451_m1	10.913	0.150587		CHEK1-Hs00967506_m1	2.4183	0.80099		IRF3-Hs01547283_m1	interferon regulatory factor 3	5.68286	5.28818	5.18227	5.14311	5.31111	5.71668	5.89381	4.97687	5.31644	5.70578	5.87883	5.54249	5.64783	5.867	5.88806
	IGF1-Hs01547656_m1	26.8224	0.257233		IRF7-Hs01014809_g1	2.4395	0.446787		IRF5-Hs00158114_m1	interferon regulatory factor 5	11.5479	12.2024	13.7984	12.0331	12.2482	12.1343	11.8922	13.9362	13.1684	12.3307	15.6606	15.4029	15.597	14.0706	15.7567
	CHEK2-Hs00200485_m1	32.8022	0.098609		CDKN2B-Hs00793225_m1	2.97966	0.989828		IRF7-Hs01014809_g1	interferon regulatory factor 7	6.91263	6.09781	5.86144	6.33204	5.57678	7.09165	6.99861	5.75428	6.15806	6.16171	7.427	6.84922	7.12072	7.68637	7.53259
	IGFBP5-Hs00181213_m1	33.453	0.206856		PRKCD-Hs01090047_m1	3.12549	0.344976		MAP2K1-Hs00983247_g1	mitogen-activated protein kinase kinase 1	6.4484	6.14667	6.39029	6.37021	6.29022	6.53038	6.83924	6.44126	6.15749	6.0937	6.62333	5.86305	6.77597	6.64424	5.49648
	CDKN1C-Hs00175938_m1	134.593	0.541087		CDKN2A-Hs00923894_m1	3.19856	0.97347		MAP2K3-Hs00177127_m1	mitogen-activated protein kinase kinase 3	4.36455	5.00358	5.45842	4.37464	4.44996	4.69741	4.75163	5.82133	5.47851	4.45744	6.60372	6.45834	6.55258	6.32015	6.87467
	ROS1-Hs00177228_m1	394.341	0.450937		PTEN-Hs02621230_s1	3.22159	0.370926		MAP2K6-Hs00992389_m1	mitogen-activated protein kinase kinase 6	12.5069	13.2707	12.3599	11.9919	13.7423	12.804	14.128	14.5863	11.2628	13.5073	11.6048	10.0074	10.1012	10.8377	10.4119
	NOX4-Hs00418356_m1	427.871	0.484347		ING1-Hs01941057_u1	3.25376	0.96518		MAPK14-Hs00176247_m1	mitogen-activated protein kinase 14	5.76133	6.03534	5.78731	5.74101	5.91875	6.11357	6.14813	5.97942	6.27942	6.19051	6.09345	5.96162	6.11433	6.22741	5.94753
	NTRK3-Hs00983871_m1	4006.42	0.370474		RB1-Hs01078066_m1	3.69006	0.710407		MDM2-Hs01066930_m1	MDM2 proto-oncogene	4.60203	4.04351	5.53242	4.45447	4.76825	2.00004	2.10053	1.31753	1.14227	1.65779	4.7797	4.59719	5.05342	5.59023	4.49558
					CCNA2-Hs00996788_m1	4.26325	0.140668		MORC3-Hs00899726_m1	MORC family CW-type zinc finger 3	5.97916	5.5019	5.95834	5.40576	5.57588	5.78418	5.92962	5.72493	5.17026	5.46059	6.45327	5.30617	6.42411	6.49054	5.31416
					E2F3-Hs00605457_m1	4.27993	0.194735		MYC-Hs00153408_m1	v-myc avian myelocytomatosis viral oncogene homolog	5.87789	4.79163	5.97789	5.58652	4.80337	6.19567	5.40013	6.66864	6.07686	5.11299	6.35816	5.75953	7.43912	7.21917	5.39498
					SIRT1-Hs01009005_m1	4.3644	0.174875		NBN-Hs01039836_m1	nibrin	7.69385	7.23764	7.31744	6.71322	7.59169	7.59969	8.03859	7.35899	6.70931	7.57674	7.45849	5.82366	7.031	7.78086	6.15931
					PIK3CA-Hs00907957_m1	4.46072	0.811473		NFKB1-Hs00765730_m1	nuclear factor kappa B subunit 1	5.41016	5.22212	5.76782	4.77721	4.50283	5.52202	5.87076	6.04974	4.9122	4.69795	6.83293	6.04244	7.25671	7.25991	6.31401
					TWIST1-Hs01675818_s1	4.70558	0.284638		NOX4-Hs00418356_m1	NADPH oxidase 4	14.2992	12.0094	13.6604	14.2923	15.093	14.7908	12.105	14.7627	14.6217		13.4313	11.9587	15.6573	14.5179	9.35013
					CDK2-Hs01548894_m1	4.7538	0.0587869		PCNA-Hs00427214_g1	proliferating cell nuclear antigen	4.35497	3.55054	3.41182	3.75164	3.69737	3.61091	3.62017	2.09759	1.83911	3.23576	3.78648	1.77975	3.37881	3.6466	2.26701
					NBN-Hs01039836_m1	5.01983	0.612132		PIK3CA-Hs00907957_m1	phosphatidylinositol-4,5-bisphosphate 3-kinase catalytic subunit alpha	7.71645	7.04693	6.77791	6.82474	7.31512	7.56104	7.89187	6.79687	6.2928	7.55869	7.58372	6.008	7.36045	7.57727	5.83588
					RBL2-Hs00180562_m1	5.13662	0.489186		PLAU-Hs01547054_m1	plasminogen activator, urokinase	3.22244	3.47437	3.9788	2.82636	3.78638	3.82196	3.55261	4.10206	2.83805	3.59512	5.54208	4.74305	4.664	3.68038	4.30402
					EGR1-Hs00152928_m1	5.15548	0.322446		PRKCD-Hs01090047_m1	protein kinase C delta	6.41393	6.46786	7.4322	6.46047	6.39097	7.27356	6.73345	7.17289	6.68128	6.54247	7.48609	7.95409	7.59273	7.06629	8.33681
					TP53BP1-Hs00996818_m1	5.52719	0.453862		PTEN-Hs02621230_s1	phosphatase and tensin homolog	6.36991	7.23058	6.71768	6.25146	6.93477	7.00273	7.19946	6.98794	6.62124	6.6863	6.55011	5.80263	6.4349	6.91456	7.1782
					ATM-Hs01112355_g1	6.15501	0.422256		RB1-Hs01078066_m1	RB transcriptional corepressor 1	7.181	6.88926	6.90525	6.59602	7.12954	7.16868	7.56902	7.34734	6.22327	6.88303	7.77825	5.63173	6.72999	6.96876	5.72279
					BCL2L2-Hs00187848_m1	7.4199	0.522276		RBL1-Hs00765700_m1	RB transcriptional corepressor like 1	8.34309	8.38636	8.0662	7.91214	8.4007	8.84118	9.5048	8.93218	8.37705	8.85091	8.16437	7.11419	7.97805	7.66122	7.98474
					TBX3-Hs00195612_m1	8	0.472948		RBL2-Hs00180562_m1	RB transcriptional corepressor like 2	7.31063	7.56195	7.8903	6.825	7.50964	7.617	7.93969	7.55864	7.3939	7.33195	7.57161	7.51511	7.63183	7.87786	7.7418
					TERF2-Hs00194619_m1	8.31669	0.285105		SERPINB2-Hs01010736_m1	serpin family B member 2	9.52067	7.69871	10.5334	9.99742	9.36514	9.87483	7.63403	10.2581	10.5902	9.05104	13.8675	16.5426	15.7622		13.5507
					CDKN1B-Hs01597588_m1	8.5711	0.748943		SERPINE1-Hs01126606_m1	serpin family E member 1	1.76086	1.74172	4.94647	1.7392	1.94649	1.7749	1.41176	4.23084	2.3539	1.55691	3.81341	4.79444	4.52616	3.59798	3.00118
					ERBB2-Hs01001580_m1	8.60761	0.23299		SIRT1-Hs01009005_m1	sirtuin 1	7.44199	6.9081	7.27132	6.71979	6.95933	7.68396	7.52017	7.28579	6.93323	7.23851	7.15381	5.74025	7.0111	7.35466	5.94122
					CCNE1-Hs01026536_m1	10.95	0.0955195		SOD1-Hs00533490_m1	superoxide dismutase 1, soluble	3.04497	2.66033	1.87615	2.37812	2.71009	2.64685	3.51096	1.91958	1.65773	3.01865	3.07944	2.03211	2.8179	3.30782	1.35912
					ETS2-Hs00232009_m1	13.1461	0.123734		SOD2-Hs00167309_m1	superoxide dismutase 2, mitochondrial	-0.916729	-1.00937	-2.00754	-1.48933	-1.67474	-0.974991	-0.434588	-1.88631	-1.9464	-1.62253	3.25405	2.42468	3.87917	4.90331	1.46163
					CDKN2C-Hs00176227_m1	14.7599	0.0807383		SPARC-Hs00234160_m1	secreted protein acidic and cysteine rich	0.94989	1.50042	1.23146	0.186842	0.769251	0.773176	1.72661	0.986748	0.0895138	0.991926	0.86611	0.717932	1.14579	1.09651	0.571468
					TBX2-Hs00911929_m1	21.5084	0.580586		TBX2-Hs00911929_m1	T-box 2	8.43035	7.96468	10.5121	8.46936	8.49488	8.65741	8.17493	11.405	9.26332	8.47642	11.9689	12.0027	11.1624	12.1974	11.693
					SERPINB2-Hs01010736_m1	22.3603	0.936443		TBX3-Hs00195612_m1	T-box 3	8.38945	6.95025	8.21714	7.81004	7.84429	8.80631	6.93122	8.63319	8.34732	8.05361	10.0879	10.0357	10.5824	8.47168	7.89695
					IGFBP5-Hs00181213_m1	27.5288	0.233171		TERF2-Hs00194619_m1	telomeric repeat binding factor 2	7.8209	8.22862	8.31485	8.14023	8.24783	8.24629	8.08886	8.35348	8.4519	8.22212	8.78876	9.26641	8.92337	8.62323	8.75315
					BCL2-Hs04986394_s1	29.0066	0.333629		TGFB1-Hs00998133_m1	transforming growth factor beta 1	3.08365	3.19813	4.44262	2.80624	3.14356	3.35095	3.41489	3.91625	4.20779	3.41448	5.76876	5.90364	5.50466	5.09129	5.10855
					ALDH1A3-Hs00167476_m1	47.6787	0.579648		TGFB1I1-Hs00210887_m1	transforming growth factor beta 1 induced transcript 1	5.4534	5.70058	6.61306	5.17445	5.52203	5.70926	5.52477	6.50537	6.34927	5.30214	6.29218	7.29734	6.71457	6.56039	7.30239
					IGF1-Hs01547656_m1	57.6703	0.672141		THBS1-Hs00962908_m1	thrombospondin 1	1.53078	1.92278	0.733828	1.10154	0.846771	1.70509	1.82173	1.13806	1.70304	0.938322	2.18484	4.05545	2.72986	2.3297	1.16777
					CHEK2-Hs00200485_m1	72.5949	0.492235		TP53-Hs01034249_m1	tumor protein p53	6.11813	6.52499	6.22152	5.45836	6.08571	6.42674	6.64131	6.3913	6.07701	6.13906	6.10599	6.37266	6.35302	6.7371	6.38878
					CDKN1C-Hs00175938_m1	182.058	0.829068		TP53BP1-Hs00996818_m1	tumor protein p53 binding protein 1	7.48208	7.81152	7.61934	7.1554	7.5754	7.76092	7.9796	7.51183	7.31739	7.68619	7.32718	6.59076	7.40416	7.87172	6.70511
					ROS1-Hs00177228_m1	188.269	0.890908		TWIST1-Hs01675818_s1	twist family bHLH transcription factor 1	6.79129	5.35086	6.55809	6.74626	7.35776	7.46961	6.09771	6.68736	7.08687	8.33313	6.84582	6.3219	7.12073	7.8318	5.47135
					IRF5-Hs00158114_m1	197.143	0.558927		VIM-Hs00185584_m1	vimentin	-0.835794	-1.12082	-0.12471	-1.47214	-0.650267	-0.739998	-0.624222	-0.160238	-1.32455	-0.659361	-1.65203	-2.60298	-1.85412	-1.86592	-1.69358
					MAP2K6-Hs00992389_m1	344.62	0.487212		CEBPB-Hs00942496_s1	CCAAT/enhancer binding protein beta	3.31831	2.64301	1.57025	2.6266	2.36623	2.94763	2.9602	1.51798	1.29456	2.23835	3.67333	1.85445	3.56835	4.59066	1.69769
					NOX4-Hs00418356_m1	495.18	0.815625		IL6-Hs00174131_m1	interleukin 6	2.83806	2.18529	2.51153	3.51777	1.03305	3.03387	2.49459	2.6783	3.12482	1.09637	2.88806	3.3476	2.94323	2.05273	1.81907
					NTRK3-Hs00983871_m1	1947.33	0.699694		BCL2-Hs04986394_s1	BCL2, apoptosis regulator	9.064	9.93711	9.44144	9.29337	8.80379	9.42921	11.3217	9.75327	9.80958	8.66086	10.6051	9.69784	10.7347	10.7647	9.68617
									BCL2L1-Hs00236329_m1	BCL2 like 1	4.60173	4.67049	4.85447	4.01909	4.50704	4.14241	4.40531	4.36491	3.65377	3.86411	4.98955	5.31472	4.88758	5.3406	5.34586
									BCL2L2-Hs00187848_m1	BCL2 like 2	7.92059	7.92779	8.51108	7.39172	7.75615	8.09835	8.26648	7.6478	7.90912	8.31686	9.5992	9.08159	9.25508	9.67474	9.33963
									ROS1-Hs00177228_m1	ROS proto-oncogene 1, receptor tyrosine kinase	13.5256	12.606	12.3701	13.1813	11.8338	13.2469	12.7485	12.2044	13.18	12.3942	13.6484	12.8493	13.7752	15.4179	10.9426
									CDKN1A-Hs00355782_m1	cyclin dependent kinase inhibitor 1A	4.0518	3.66892	5.92643	3.95352	4.21108	2.23521	2.09582	2.10294	2.00743	1.7797	4.58356	4.59865	4.66431	5.19114	5.03167
									NTRK3-Hs00983871_m1	neurotrophic receptor tyrosine kinase 3	16.5792	15.3975	13.1267	15.508	16.2295	16.2677	17.3314	13.9798	15.3802			17.1366	18.2614		14.1831
									ERBB2-Hs01001580_m1	erb-b2 receptor tyrosine kinase 2	7.41366	8.48752	8.39106	7.24438	8.08094	7.89005	8.39645	8.72326	8.47777	8.03379	8.59478	9.40841	8.49877	8.6712	9.81152
									HIF1A-Hs00153153_m1	hypoxia inducible factor 1 alpha subunit	1.21107	1.01216	-0.0039139	0.726444	0.777893	1.19743	1.64621	0.258038	0.244335	0.945911	1.77865	0.838968	1.94746	1.88591	0.0765724
									HSP90AA1-Hs00743767_sH	heat shock protein 90 alpha family class A member 1	1.45455	0.713356	0.542971	0.976482	1.17481	1.37327	1.49039	0.667278	-0.0700645	1.19559	1.46826	-0.0072479	1.37847	1.71788	-0.486504

## Sheet: Figure S2-B
		Ratio NP/Total IVD area
	Disc 1	0.4
	Disc 2	0.37
	Disc 3	0.39
	Disc 4	0.3
	Disc 5	0.32
	Disc 6	0.4
	Disc 7	0.42
	Disc 8	0.26
	Disc 9	0.28
	Disc 10	0.39
	Disc 11	0.35

## Sheet: Figure S2-C
		NP center shift / IVD center
	Disc 1	0.16
	Disc 2	0.09
	Disc 3	0.09
	Disc 4	0.13
	Disc 5	0.08
	Disc 6	0.12
	Disc 7	0.12
	Disc 8	0.03
	Disc 9	0.07
	Disc 10	0.06
	Disc 11	0.09
