# Supplementary material for: Senotherapeutic drugs for human intervertebral disc degeneration and low back pain
Source: eLife. 2020 Aug 21;9:e54693. doi: 10.7554/eLife.54693 (PMC7442487; doi:10.7554/eLife.54693)
Supplement: Figure 3—figure supplement 1—source data 1. [file elife-54693-fig3-figsupp1-data1.xlsx]

## Sheet: Figure S3-B
percentage difference in -O-Vanillin /CTRL	1	2	3	4	5		AVERAGE percentage difference in -O-Vanillin /CTRL	STD	SMEM	N
CXCL5	7.38989	106.402	99.6667	-16.0782	-0.409269		39.3943	58.7551	26.2761	5
G-CSF			-52.3741				-52.3741			1
GM-CSF			-3.40626				-3.40626			1
GRO a/b/g	11.9212	84.0709	39.2604		40.991		44.0609	29.8118	14.9059	4
CXCL1	9.54087	8.30685	18.6452	-59.2569	-19.216		-8.396	31.7641	14.2054	5
CCL1	26.5231	17.5365	27.7393	-39.3453	-19.912		2.50832	30.3873	13.5896	5
IL-1 alpha	21.2878	-5.74604		14.4596	-23.8179		-18.7633	48.7398	24.3699	4
IL-1 beta	18.5863	-8.86738	24.7624	-13.8448	-30.7726		-2.02724	23.2128	10.3811	5
IL-2	12.2315	-11.9551					0.138235	17.1025	12.0933	2
IL-3	14.692	-26.4106	32.6612	-25.2633	-15.1111		-3.88635	26.3211	11.7711	5
IL-4			9.14104		-2.30643		3.41731	8.09458	5.72373	2
IL-5	-68.8653						-68.8653			1
IL-6	-21.1063	-0.402316	13.6818	-58.1983	-16.4845		-16.5019	27.0649	12.1038	5
IL-7	-90.7285	-80.2345	-30.016	-40.544	-60.3431		-60.3732	25.6451	11.4688	5
IL-8	-0.891043	-7.16008	3.31797	-91.9766	-22.7908		-23.9001	39.3259	17.5871	5
IL-10			-37.6977				-37.6977			1
IL-12	-3.69179	3.91657	23.4816	-21.2786	-17.4291		-3.00028	17.9715	8.03711	5
IL-13
IL-15	-4.05628	-15.7949	25.4895	16.2928	-46.6979		-4.95336	28.4566	12.7262	5
IFN-gamma	8.96894	-13.9834	19.5342	-24.0219	-3.02123		-2.50468	17.4096	7.78579	5
CCL2	4.62031	-21.9443	35.7392	-0.538736	-20.5896		-0.542605	23.4677	10.4951	5
CCL8	-25.4308	-33.5463	30.7401	-23.3495	-12.9034		-12.898	25.4801	11.395	5
CCL7	-39.6969	-12.7201	29.0036	-10.8025	-4.82652		-7.80848	24.5661	10.9863	5
M-CSF	-39.9316	8.87713	32.8119	1.64869	-13.3889		-1.99654	26.9815	12.0665	5
CCL22	-48.036	-15.4137	-30.9413	12.0343	-3.06284		-17.0839	23.4377	10.4817	5
CXCL9	-13.6942	-16.4114	-31.6662	8.95876	-15.6042		-13.6835	14.5532	6.50838	5
CCL4	-28.859	-6.55844	23.1764	-9.20827	-33.7355		-11.037	22.51	10.0668	5
MIP-1 delta	-22.2534	-8.03392	46.7539	-12.2374	-46.8986		-8.53389	34.3904	15.3798	5
CCL5	-28.859	-6.55844	23.1764	-9.20827	-33.7355		-11.037	22.51	10.0668	5
SCF	-22.2534	-8.03392	46.7539	-12.2374	-46.8986		-8.53389	34.3904	15.3798	5
SDF-1 alpha	4.87258	5.29236	59.3803	37.5495	-38.632		13.6925	37.2248	16.6474	5
CCL17	-21.9225	-27.4847	61.8305	63.1053	-32.0095		8.70384	49.2116	22.0081	5
TGF beta 1	-46.4251	-30.8763	28.5896	19.036	-14.8923		-8.91364	32.0659	14.3403	5
TNF-alpha	-46.8351	-10.3425	26.8442	30.7633	-50.3945		-9.99293	38.755	17.3318	5
TNF-beta	-46.4131						-46.4131			1
EGF	-45.781	11.7569	-23.3707	7.80677	-17.506		-13.4188	23.7034	10.6005	5
IGF-1	-47.0709	10.2236	-32.6475	11.5582	-37.1777		-19.0229	27.805	12.4348	5
Angiogenin	-32.8688	-71.5724	-71.9575	-28.6833	-46.0322		-50.2228	20.6814	9.24899	5
OSM	-34.8692	-7.5269	15.5056	-47.2313	-37.4762		-22.3196	25.7749	11.5269	5
TPO	-45.6248	4.77138	-13.0628	-24.0231	-42.1766		-24.0232	20.8892	9.34193	5
VEGF-A	-18.6629	2.07307	2.38593	-15.1212	-46.2764		-15.1203	19.9081	8.90319	5
PDGF-BB	-14.4219	15.3893	25.413				8.79346	20.7204	11.9629	3
Leptin	-44.5161	28.3663	35.0834	-13.1221	-71.3767		-13.113	45.8918	20.5234	5
BDNF	-31.3476	7.05947	32.3444	38.7038	-34.1125		2.5295	34.3086	15.3433	5
CXCL13	-45.3103	17.3692	11.5525	12.3891	-1.00213		-1.00033	25.6791	11.484	5
CCL23	-49.218	40.318	-17.4436	9.70482	-4.16221		-4.16021	33.0802	14.7939	5
CCL11	-50.579	28.4996	-41.4329	-63.2128	20.8424		-21.1765	42.6473	19.0725	5
CCL24	-53.6999	38.6688	-42.1421	30.9589	-30.5835		-11.3595	43.0219	19.24	5
CCL26	-39.758	-29.9873	-40.5252	-51.4535	-38.9983		-40.1445	7.62673	3.41078	5
FGF-4	-63.1609	19.3651	-11.099	-36.6333	-31.0785		-24.5213	30.777	13.7639	5
FGF-6	-66.9347	-8.12009	-18.2773	-39.729	-41.8094		-34.9741	22.8623	10.2243	5
FGF-7	-30.7812	-27.9925	-15.8098	-15.8574	-26.0314		-23.2945	7.01683	3.13802	5
FGF-9	-22.922	-15.6233	29.8051	10.1298	-44.1265		-8.54737	28.9064	12.9273	5
FLT-3 Ligand	-53.2179	44.1195	-10.295	45.2218	-58.1879		-6.47191	50.2645	22.479	5
CX3CL1	-50.1274	26.5667	0.238977	-14.9877	-37.7709		-15.2161	30.464	13.6239	5
CXCL6	-23.523	43.3361	16.0414	19.1143			13.7422	27.6805	13.8403	4
GDNF	-51.7033	62.8358	2.01009	26.0035			9.78652	48.0232	24.0116	4
HGF	-63.9281	-61.5535	-40.8337	-57.9983	-37.7864		-52.42	12.2	5.456	5
IGFBP-1	-57.458	80.1087	-47.1635	85.2739	38.8671		19.9256	68.4477	30.6107	5
IGFBP-2	-28.3377	93.4326	-45.0142	93.8117	-9.77632		20.8232	67.615	30.2383	5
IGFBP-3	-67.9692	15.7608	-20.8182	-25.3489	-36.5777		-26.9906	30.1647	13.49	5
IGFBP-4	-51.6022	6.97746	-2.89904	-17.1956	-21.3073		-17.2053	22.3016	11.1508	4
IL16	-39.7595	75.1454	-20.5896	-6.1217	-26.7064		-3.60634	45.6543	20.4172	5
CXCL10	-33.7093	-5.19384	-3.01217	-19.7783	-28.8748		-18.1137	13.7547	6.15131	5
LIF	-34.1736	-1.52113	-21.285	48.0771	-42.1453		-10.2096	36.0196	16.1085	5
LIGHT TNFSF-14	-55.7278	37.9966	-25.6267	56.7445	-34.853		-4.29327	48.8584	21.8501	5
CCL13	-70.2012	23.1002	-28.3167	-30.1189	-20.1341		-25.1342	33.2324	14.862	5
MIF	-53.6662	63.8862	-8.7583	161.611	-1.79025		32.2564	83.6018	37.3879	5
MIP-3 alpha	-62.8531	237.39	79.2977				84.6115	150.192	86.7133	3
CXCL7	-31.4912	161.966	-10.9718	140.425	53.1889		62.6233	87.0127	38.9132	5
NT-3		7.72331	-57.7019	71.7195	29.3424		12.7708	53.9797	26.9899	4
NT-4	-39.1805	28.8426	-8.5223	91.6268	-48.0753		4.93826	57.0622	25.519	5
OPN (SPP1)	-57.2651	19.794	-23.179	4.31011	62.0472		1.14144	44.9174	20.0877	5
OPG	-23.5273	-17.7182	14.9663	-14.413	-16.8978		-11.518	15.1774	6.78752	5
PARC	-42.8063	14.1963	-45.9845	-32.9109	-18.2794		-25.1569	24.502	10.9576	5
PLGF	-53.194	37.9724	-50.6883	46.782	-4.77346		-4.78029	47.2702	21.1399	5
TGF-beta-2	-51.8269	-36.6578	-35.5986	53.141	-28.2311		-19.8347	41.6862	18.6427	5
TGF-beta-3	-73.868	20.5346	-35.4498	34.1821	-9.84629		-12.8895	43.5015	19.4544	5
TIMP1	-28.4622	18.5312	-6.30424	71.1007	-14.2232		8.12846	39.1168	17.4936	5
TIMP2	-26.8711	17.1379	-21.473	13.7594	-20.4816		-7.58568	21.2012	9.48145	5

## Sheet: Figure S3-C
Percentage difference in -RG7112 /CTRL	1	2	3	4	5		AVERAGE percentage difference in -RG7112 /CTRL	STD	SMEM	N
CXCL5	8.97361	-12.7921	-76.8799	-32.4559	-4.04212		-23.4393	33.4567	14.9623	5
G-CSF			-62.8721				-62.8721			1
GM-CSF			-67.1037				-67.1037			1
GRO a/b/g	20.2762	76.8595	-57.4829		29.318		17.2427	55.657	27.8285	4
CXCL1	13.1492	-14.215	-41.3181	-63.0998	-0.85174		-21.2671	30.8343	13.7895	5
CCL1	-29.3758	34.6396	-17.7987	-39.5326	-30.2568		-16.4649	29.5909	13.2334	5
IL-1 alpha	9.03095	-17.9584		0.367558	-15.4678		-6.0069	12.8985	6.44926	4
IL-1 beta	17.8828	-33.0444	-72.6504	-17.6334	-13.1478		-23.7186	33.0179	14.7661	5
IL-2	-2.79318	-49.5977					-26.1955	33.0958	23.4023	2
IL-3	-27.7654	-26.8729	-51.3728	-26.6837	-13.2237		-29.1837	13.7902	6.16716	5
IL-4			-51.5102		-25.2587		-38.3845	18.5626	13.1258	2
IL-5	-40.6469						-40.6469			1
IL-6	-17.292	-72.5473	-88.125	-80.2346	-38.429		-59.3256	30.1865	13.4998	5
IL-7	8.31699	-20.5438	-64.7845	-34.1373	-30.0243		-28.2346	26.3112	11.7667	5
IL-8	4.80589	-22.7678	-18.0591	-92.4525	-5.8295		-26.8606	38.2152	17.0903	5
IL-10			-83.0934				-83.0934			1
IL-12	-46.8234	7.79671	-70.7398	-14.9615	-32.1342		-31.3725	29.9693	13.4027	5
IL-13
IL-15	31.2092	-31.374	-58.7773	4.88246	-1.12737		-11.0374	34.7458	15.5388	5
IFN-gamma	-21.4853	-32.5651	-40.0148	-10.9152	-30.1379		-27.0237	11.1729	4.99665	5
CCL2	-8.097	-24.1542	-14.6869	-10.7834	3.84293		-10.7757	10.1878	4.5561	5
CCL8	-49.2647	1.60704	-89.3915	-1.64098	-34.6687		-34.6718	37.4646	16.7547	5
CCL7	-53.1683	20.5694	-79.9918	-51.0177	-24.046		-37.5309	38.0356	17.01	5
M-CSF	-24.2042	18.6784	-56.6828	25.5284	15.5028		-4.23549	35.1781	15.7321	5
CCL22	-18.4953	17.0556	-56.8255	35.3824	13.4694		-1.88269	36.324	16.2446	5
CXCL9	-18.2623	-6.46567	-86.0975	14.1814	5.26195		-18.2764	39.8333	17.814	5
CCL4	29.3474	-6.88916	-77.5176	29.0459	26.9398		0.185275	46.0623	20.5997	5
MIP-1 delta	-73.3164			23.62			-24.8482	68.5444	30.654	2
CCL5	-16.2661	-23.9508	-66.8561	-34.3751	-23.1343		-32.9165	20.0458	8.96475	5
SCF	-15.1793	-31.3624	-61.9393	-25.6688	-7.68079		-28.3661	20.8877	9.34126	5
SDF-1 alpha	-58.338	-73.8796	-86.9606	-51.1877	-92.8783		-72.6488	17.8952	8.003	5
CCL17	-69.2348	-77.3453	-86.8762	-90.3452	-66.4659		-78.0535	10.5056	4.69825	5
TGF beta 1	-58.338		-86.9606				-72.6493	20.2393	9.05129	2
TNF-alpha	-69.2348		-86.8762				-78.0555	12.4744	5.57872	2
TNF-beta	-43.6777						-43.6777			1
EGF	-27.7233	33.7711	-78.0037	21.1567	12.0511		-7.74963	45.5143	20.3546	5
IGF-1	-24.7982	27.9015	-82.779	23.8552	-10.8757		-13.3392	44.8427	20.0543	5
Angiogenin	111.868	-58.7678	-56.9893	-10.2929	-4.10366		-3.65714	69.4115	31.0418	5
OSM	-26.6319	-26.9745	-47.823	-40.4872	-34.8451		-35.3523	9.06059	4.05202	5
TPO	1.66452	-3.03315	-44.1444	-14.4723	-12.4246		-14.482	17.8597	7.98711	5
VEGF-A	18.4397	-18.9592	-41.1283	-9.76854	2.59334		-9.7646	22.4523	10.041	5
PDGF-BB	-14.949	-33.2941	-59.0406				-35.7612	22.1491	12.7878	3
Leptin	-28.3471	-11.596	-56.3084	-36.2221	-48.6838		-36.2315	17.5158	7.8333	5
BDNF	-41.972	-14.0247	-60.6324	47.3294	-2.05196		-14.2703	41.4147	18.5212	5
CXCL13	-56.8754	-7.94799	-74.2097	22.9037	-28.9877		-29.0234	38.5945	17.26	5
CCL23	-56.344	22.9129	-61.2219	27.4113	-26.9154		-18.8314	42.2802	18.9083	5
CCL11	-33.109	30.9429	-69.492	-76.8765	29.1343		-23.8801	51.9382	23.2275	5
CCL24	-34.1809	55.3964	-74.6318	49.1905	68.3527		12.8254	63.3963	28.3517	5
CCL26	-45.8483	-77.3998	-85.5308	-56.6877	-67.9873		-66.6908	15.857	7.09148	5
FGF-4	-41.8548	-10.8449	-66.1474	-35.7766	-25.554		-36.0355	20.5249	9.17901	5
FGF-6	-35.5337	-15.484	-35.7091	-30.1004	7.34072		-21.8973	18.303	8.18536	5
FGF-7	41.8602	39.0368	-64.17	-58.6752	-13.9426		-11.1782	51.0058	22.8105	5
FGF-9	13.3147	-24.0257	-50.0199	-5.35361	-15.7273		-16.3624	23.4195	10.4735	5
FLT-3 Ligand	-13.2437	7.49283	-77.684	-70.2349	14.544		-27.8251	43.4155	19.416	5
CX3CL1	-52.6561	5.04323	-79.72	-38.7877	-26.7377		-38.5716	31.3604	14.0248	5
CXCL6	-36.0395	-55.0368	-91.5175	35.114			-36.87	53.2252	26.6126	4
GDNF	-51.0803	27.8356	-66.2264	25.6507			-15.9551	49.6979	24.849	4
HGF	-48.9803	-73.8765	-81.4828	-55.5436	-66.3245		-65.2415	13.2098	5.9076	5
IGFBP-1	-15.2389	27.6365	-82.3306	77.6938	36.5183		8.8558	60.7291	27.1589	5
IGFBP-2	5.84364	24.8708	-75.7903	72.5184	-20.4337		1.40176	54.917	24.5596	5
IGFBP-3	-42.519	3.10906	-10.8732	-20.4141	-49.9236		-24.1242	21.9942	9.83611	5
IGFBP-4	-26.1837	-24.918	-73.4575	-39.9123	-35.146		-39.9235	19.7566	9.87832	4
IL16	8.78471	28.2662	-70.8799	0.0738893	-28.2728		-12.4056	38.5032	17.2191	5
CXCL10	31.8296	-29.8314	-45.9652	-33.8797	-6.20483		-16.8103	30.7784	13.7645	5
LIF	-8.07756	-18.6794	1.17081	34.1541	-45.4832		-7.38304	29.0612	12.9966	5
LIGHT TNFSF-14	-42.4854	14.4777	-83.5399	38.1853	-30.7842		-20.8293	48.0365	21.4826	5
CCL13	-58.7494	0.599405	-82.9487	-26.7733	-67.312		-47.0368	33.6071	15.0296	5
MIF	-52.0821	37.0954	-77.2846	150.046	61.3821		23.8313	91.5196	40.9288	5
MIP-3 alpha	-66.5106	85.4915	-94.5536				-25.1909	96.8738	55.9301	3
CXCL7	-38.2203	61.4597	-88.1933	117.425	6.21047		11.7363	80.862	36.1626	5
NT-3		-24.7088	-54.748	56.1487	30.6975		1.84735	50.6269	25.3134	4
NT-4	-23.7241	19.1592	-79.0316	39.3809	-68.8776		-22.6186	52.2323	23.359	5
OPN (SPP1)	18.3221	71.9133	24.5008	-14.3307	-14.7626		17.1286	35.5805	15.9121	5
OPG	-9.63147	-29.2504	-44.4901	-26.6359	-16.8203		-25.3656	13.2574	5.92889	5
PARC	32.2991	-16.827	-77.6672	-42.6578	-9.95987		-22.9626	40.7464	18.2223	5
PLGF	-11.3779	-6.32755	-81.2812	15.4419	-20.8932		-20.8876	36.2962	16.2322	5
TGF-beta-2	-27.478	-40.7825	9.68553	15.1213	33.7793		-1.93488	31.0767	13.8979	5
TGF-beta-3	-22.0855	-3.07372	-84.4578	11.5174	27.184		-14.1831	43.2902	19.36	5
TIMP1	-19.9602	25.4493	-47.59	35.6705	-5.29123		-2.34433	33.8518	15.139	5
TIMP2	-18.7272	37.9986	-35.3171	-13.1866	-18.1317		-9.4728	27.8203	12.4416	5

## Sheet: Figure S3-D
Pellets Samples (pg / ml)	TNF-alpha	IL1-alpha	IL1-beta	CCL5	CCL11	CCL26	CXCL11	CX3CL1	Angiogenin
CTRL (1)	16.1901	45.5316	2.76559	15.2218	4.45792	3.19031	32.725	69.4403	32.0814
CTRL (2)	15.9506	50.0458	1.35511	47.5959	4.87428	3.42062	31.6765	76.9806	7.89122
CTRL (3)	15.4709	43.2887	2.78465	25.5244	5.06582	3.38437	32.3059	69.3252	52.1662
CTRL (4)	14.75	44.0634	2.11584	22.9045	4.60625	2.93517	29.1285	67.0645	36.2075
CTRL (5)	14.2696	43.3974	16.3285	18.602	5.57989	2.77699	27.3997	61.2407	59.4858
o-Vanillin (1)	16.9032	43.4517	2.28138	15.8465	4.63067	3.26302	30.4044	62.3691	14.2778
o-Vanillin (2)	12.094	43.9956	1.0151	39.7504	4.38291	3.02029	29.1363	71.4426	14.8768
o-Vanillin (3)	8.18618	24.1337	1.4175	10.9069	2.93461	1.84755	19.089	35.2071	15.9921
o-Vanillin (4)	14.0231	42.0651	0.656775	22.2447	4.38291	3.06884	28.7062	4.0138	7.39947
o-Vanillin (5)	5.7018	18.6646	1.4175	4.86176	4.12931	0.743493	20.0473	29.1694	12.3249
RG-7112 (1)	13.0622	41.1675	0.656775	18.0114	4.48192	3.11745	29.1285	57.1994	32.8134
RG-7112 (2)	9.16988	26.2099	1.4175	10.1697	2.75905	1.62596	13.1363	37.1991	25.9285
RG-7112 (3)	18.8142	43.6421	1.35511	25.5435	4.89826	3.31163	32.5183	67.9585	39.8224
RG-7112 (4)	1.60512	1.96454	0.656775	1.99785	0.440582	0.325905	1.12165	63.3672	61.8388
RG-7112 (5)	9.41494	8.91633	1.4175	10.01	1.51213	2.04398	7.49418	17.2293	51.5817
