# Supplementary material for: Senotherapeutic drugs for human intervertebral disc degeneration and low back pain
Source: eLife. 2020 Aug 21;9:e54693. doi: 10.7554/eLife.54693 (PMC7442487; doi:10.7554/eLife.54693)
Supplement: Figure 3—source data 1. [file elife-54693-fig3-data1.xlsx]

## Sheet: Figure 3A-a
	Cytokines
		o-Vanillin					RG-7112
	IL-1 b	18.5863	-8.86738	24.7624	-13.8448	-30.7726	17.8828	-33.0444	-72.6504	-17.6334	-13.1478
	IL-3	14.692	-26.4106	32.6612	-25.2633	-15.1111	-27.7654	-26.8729	-51.3728	-26.6837	-13.2237
	IL-6	-21.1063	-0.402316	13.6818	-58.1983	-16.4845	-17.292	-72.5473	-88.125	-80.2346	-38.429
	IL-7	-90.7285	-80.2345	-30.016	-40.544	-60.3431	8.31699	-20.5438	-64.7845	-34.1373	-30.0243
	IL-8	-0.891043	-7.16008	3.31797	-91.9766	-22.7908	4.80589	-22.7678	-18.0591	-92.4525	-5.8295
	TNFa	-46.8351	-10.3425	26.8442	30.7633	-50.3945	-69.2348	-77.3453	-86.8762	-90.3452	-66.4659
	IFNg	8.96894	-13.9834	19.5342	-24.0219	-3.02123	-21.4853	-32.5651	-40.0148	-10.9152	-30.1379

## Sheet: Figure 3A-b
	C C - Chemokines
		o-Vanillin					RG-7112
	CCL5	-28.859	-6.55844	23.1764	-9.20827	-33.7355	-16.2661	-23.9508	-66.8561	-34.3751	-23.1343
	CCL7	-39.6969	-12.7201	29.0036	-10.8025	-4.82652	-53.1683	20.5694	-79.9918	-51.0177	-24.046
	CCL11	-50.579	28.4996	-41.4329	-63.2128	20.8424	-33.109	30.9429	-69.492	-76.8765	29.1343
	CCL22	-48.036	-15.4137	-30.9413	12.0343	-3.06284	-18.4953	17.0556	-56.8255	35.3824	13.4694
	CCL26	-39.758	-29.9873	-40.5252	-51.4535	-38.9983	-45.8483	-77.3998	-85.5308	-56.6877	-67.9873

## Sheet: Figure 3A-c
	C X C - Chemokines
			o-Vanillin					RG-7112
		CXCL1	9.54087	8.30685	18.6452	-59.2569	-19.216	13.1492	-14.215	-41.3181	-63.0998	-0.85174
		CXCL9	-13.6942	-16.4114	-31.6662	8.95876	-15.6042	-18.2623	-6.46567	-86.0975	14.1814	5.26195
		CXCL10	-33.7093	-5.19384	-3.01217	-19.7783	-28.8748	31.8296	-29.8314	-45.9652	-33.8797	-6.20483
		CXCL13	-45.3103	17.3692	11.5525	12.3891	-1.00213	-56.8754	-7.94799	-74.2097	22.9037	-28.9877
		CX3CL1	-50.1274	26.5667	0.238977	-14.9877	-37.7709	-52.6561	5.04323	-79.72	-38.7877	-26.7377

## Sheet: Figure 3A-d
	Growth and neurotrophic factors
		o-Vanillin					RG-7112
	Ang	-32.8688	-71.5724	-71.9575	-28.6833	-46.0322	111.868	-58.7678	-56.9893	-10.2929	-4.10366
	HGF	-63.9281	-61.5535	-40.8337	-57.9983	-37.7864	-48.9803	-73.8765	-81.4828	-55.5436	-66.3245
	FGF4	-63.1609	19.3651	-11.099	-36.6333	-31.0785	-41.8548	-10.8449	-66.1474	-35.7766	-25.554
	EGF	-45.781	11.7569	-23.3707	7.80677	-17.506	-27.7233	33.7711	-78.0037	21.1567	12.0511
	SCF	-22.2534	-8.03392	46.7539	-12.2374	-46.8986	-15.1793	-31.3624	-61.9393	-25.6688	-7.68079
	VEGFA	-18.6629	2.07307	2.38593	-15.1212	-46.2764	18.4397	-18.9592	-41.1283	-9.76854	2.59334
	TGFb2	-51.8269	-36.6578	-35.5986	53.141	-28.2311	-27.478	-40.7826	9.68553	15.1213	33.7793
	IGFBP4	-51.6022	6.97746	-2.89904	-17.1956	-21.3073	-26.1837	-24.918	-73.4575	-39.9123	-35.146

## Sheet: Figure 3A-e
	% of Change/CTRL for each donor
	O-Vanillin					RG-7112
	1	2	3	4	5	1	2	3	4	5	AVERAGE O-Vanillin	Average RG-7112
CXCL1	9.54087	8.30685	18.6452	-59.2569	-19.216	13.1492	-14.215	-41.3181	-63.0998	-0.85174	-8.396	-21.2671
IL-1 beta	18.5863	-8.86738	24.7624	-13.8448	-30.7726	17.8828	-33.0444	-72.6504	-17.6334	-13.1478	-2.02724	-23.7186
IL-3	14.692	-26.4106	32.6612	-25.2633	-15.1111	-27.7654	-26.8729	-51.3728	-26.6837	-13.2237	-3.88635	-29.1837
IL-6	-21.1063	-0.402316	13.6818	-58.1983	-16.4845	-17.292	-72.5473	-88.125	-80.2346	-38.429	-16.5019	-59.3256
IL-7	-90.7285	-80.2345	-30.016	-40.544	-60.3431	8.31699	-20.5438	-64.7845	-34.1373	-30.0243	-60.3732	-28.2346
IL-8	-0.891043	-7.16008	3.31797	-91.9766	-22.7908	4.80589	-22.7678	-18.0591	-92.4525	-5.8295	-23.9001	-26.8606
IL-12	-3.69179	3.91657	23.4816	-21.2786	-17.4291	-46.8234	7.79671	-70.7398	-14.9615	-32.1342	-3.00028	-31.3725
IL-15	-4.05628	-15.7949	25.4895	16.2928	-46.6979	31.2092	-31.374	-58.7773	4.88246	-1.12737	-4.95336	-11.0374
IFN-gamma	8.96894	-13.9834	19.5342	-24.0219	-3.02123	-21.4853	-32.5651	-40.0148	-10.9152	-30.1379	-2.50468	-27.0237
CCL2	4.62031	-21.9443	35.7392	-0.538736	-20.5896	-8.097	-24.1542	-14.6869	-10.7834	3.84293	-0.542605	-10.7757
CCL8	-25.4308	-33.5463	30.7401	-23.3495	-12.9034	-49.2647	1.60704	-89.3915	-1.64098	-34.6687	-12.898	-34.6718
CCL7	-39.6969	-12.7201	29.0036	-10.8025	-4.82652	-53.1683	20.5694	-79.9918	-51.0177	-24.046	-7.80848	-37.5309
M-CSF	-39.9316	8.87713	32.8119	1.64869	-13.3889	-24.2042	18.6784	-56.6828	25.5284	15.5028	-1.99654	-4.23549
CCL22	-48.036	-15.4137	-30.9413	12.0343	-3.06284	-18.4953	17.0556	-56.8255	35.3824	13.4694	-17.0839	-1.88269
CXCL9	-13.6942	-16.4114	-31.6662	8.95876	-15.6042	-18.2623	-6.46567	-86.0975	14.1814	5.26195	-13.6835	-18.2764
CCL5	-28.859	-6.55844	23.1764	-9.20827	-33.7355	-16.2661	-23.9508	-66.8561	-34.3751	-23.1343	-11.037	-32.9165
SCF	-22.2534	-8.03392	46.7539	-12.2374	-46.8986	-15.1793	-31.3624	-61.9393	-25.6688	-7.68079	-8.53389	-28.3661
TGF beta 1	-46.4251	-30.8763	28.5896	19.036	-14.8923	-58.338	-73.8796	-86.9606	-51.1877	-92.8783	-8.91364	-72.6488
TNF-alpha	-46.8351	-10.3425	26.8442	30.7633	-50.3945	-69.2348	-77.3453	-86.8762	-90.3452	-66.4659	-9.99293	-78.0535
EGF	-45.781	11.7569	-23.3707	7.80677	-17.506	-27.7233	33.7711	-78.0037	21.1567	12.0511	-13.4188	-7.74963
IGF-1	-47.0709	10.2236	-32.6475	11.5582	-37.1777	-24.7982	27.9015	-82.779	23.8552	-10.8757	-19.0229	-13.3392
Angiogenin	-32.8688	-71.5724	-71.9575	-28.6833	-46.0322	111.868	-58.7678	-56.9893	-10.2929	-4.10366	-50.2228	-3.65714
OSM	-34.8692	-7.5269	15.5056	-47.2313	-37.4762	-26.6319	-26.9745	-47.823	-40.4872	-34.8451	-22.3196	-35.3523
TPO	-45.6248	4.77138	-13.0628	-24.0231	-42.1766	1.66452	-3.03315	-44.1444	-14.4723	-12.4246	-24.0232	-14.482
VEGF-A	-18.6629	2.07307	2.38593	-15.1212	-46.2764	18.4397	-18.9592	-41.1283	-9.76854	2.59334	-15.1203	-9.7646
Leptin	-44.5161	28.3663	35.0834	-13.1221	-71.3767	-28.3471	-11.596	-56.3084	-36.2221	-48.6838	-13.113	-36.2315
CXCL13	-45.3103	17.3692	11.5525	12.3891	-1.00213	-56.8754	-7.94799	-74.2097	22.9037	-28.9877	-1.00033	-29.0234
CCL23	-49.218	40.318	-17.4436	9.70482	-4.16221	-56.344	22.9129	-61.2219	27.4113	-26.9154	-4.16021	-18.8314
CCL11	-50.579	28.4996	-41.4329	-63.2128	20.8424	-33.109	30.9429	-69.492	-76.8765	29.1343	-21.1765	-23.8801
CCL26	-39.758	-29.9873	-40.5252	-51.4535	-38.9983	-45.8483	-77.3998	-85.5308	-56.6877	-67.9873	-40.1445	-66.6908
FGF-4	-63.1609	19.3651	-11.099	-36.6333	-31.0785	-41.8548	-10.8449	-66.1474	-35.7766	-25.554	-24.5213	-36.0355
FGF-6	-66.9347	-8.12009	-18.2773	-39.729	-41.8094	-35.5337	-15.484	-35.7091	-30.1004	7.34072	-34.9741	-21.8973
FGF-7	-30.7812	-27.9925	-15.8098	-15.8574	-26.0314	41.8602	39.0368	-64.17	-58.6752	-13.9426	-23.2945	-11.1782
FGF-9	-22.922	-15.6233	29.8051	10.1298	-44.1265	13.3147	-24.0257	-50.0199	-5.35361	-15.7273	-8.54737	-16.3624
FLT-3 Ligand	-53.2179	44.1195	-10.295	45.2218	-58.1879	-13.2437	7.49283	-77.684	-70.2349	14.544	-6.47191	-27.8251
CX3CL1	-50.1274	26.5667	0.238977	-14.9877	-37.7709	-52.6561	5.04323	-79.72	-38.7877	-26.7377	-15.2161	-38.5716
HGF	-63.9281	-61.5535	-40.8337	-57.9983	-37.7864	-48.9803	-73.8765	-81.4828	-55.5436	-66.3245	-52.42	-65.2415
IGFBP-3	-67.9692	15.7608	-20.8182	-25.3489	-36.5777	-42.519	3.10906	-10.8732	-20.4141	-49.9236	-26.9906	-24.1242
IGFBP-4	-51.6022	6.97746	-2.89904	-17.1956	-21.3073	-26.1837	-24.918	-73.4575	-39.9123	-35.146	-17.2053	-39.9235
IL16	-39.7595	75.1454	-20.5896	-6.1217	-26.7064	8.78471	28.2662	-70.8799	0.0738893	-28.2728	-3.60634	-12.4056
CXCL10	-33.7093	-5.19384	-3.01217	-19.7783	-28.8748	31.8296	-29.8314	-45.9652	-33.8797	-6.20483	-18.1137	-16.8103
LIF	-34.1736	-1.52113	-21.285	48.0771	-42.1453	-8.07756	-18.6794	1.17081	34.1541	-45.4832	-10.2096	-7.38304
LIGHT TNFSF-14	-55.7278	37.9966	-25.6267	56.7445	-34.853	-42.4854	14.4777	-83.5399	38.1853	-30.7842	-4.29327	-20.8293
CCL13	-70.2012	23.1002	-28.3167	-30.1189	-20.1341	-58.7494	0.599405	-82.9487	-26.7733	-67.312	-25.1342	-47.0368
OPG	-23.5273	-17.7182	14.9663	-14.413	-16.8978	-9.63147	-29.2504	-44.4901	-26.6359	-16.8203	-11.518	-25.3656
PARC	-42.8063	14.1963	-45.9845	-32.9109	-18.2794	32.2991	-16.827	-77.6672	-42.6578	-9.95987	-25.1569	-22.9626
PLGF	-53.194	37.9724	-50.6883	46.782	-4.77346	-11.3779	-6.32755	-81.2812	15.4419	-20.8932	-4.78029	-20.8876
TGF-beta-2	-51.8269	-36.6578	-35.5986	53.141	-28.2311	-27.478	-40.7825	9.68553	15.1213	33.7793	-19.8347	-1.93488
TGF-beta-3	-73.868	20.5346	-35.4498	34.1821	-9.84629	-22.0855	-3.07372	-84.4578	11.5174	27.184	-12.8895	-14.1831
TIMP2	-26.8711	17.1379	-21.473	13.7594	-20.4816	-18.7272	37.9986	-35.3171	-13.1866	-18.1317	-7.58568	-9.4728

## Sheet: Figure 3B
Pellets Samples (pg / ml)	IFN-gamma	TNF-alpha	IL1-alpha	IL1-beta	IL-6	IL-8	CCL5	CCL7	CCL11	CCL24	CCL26	CXCL1	CXCL5	CXCL9	CXCL10	CXCL11	CX3CL1	Angiogenin	VEGF-A
CTRL (1)	1.22318	16.1901	45.5316	2.76559	10724.9	85293.3	15.2218	162.28	4.45792	34.8174	3.19031	2190.08	1674.42	17.2836	168.151	32.725	69.4403	32.0814	15410.3
CTRL (2)	1.22426	15.9506	50.0458	1.35511	10725.2	98764.7	47.5959	158.333	4.87428	17.3082	3.42062	1867.2	3448.2	7.99086	77.0187	31.6765	76.9806	7.89122	3488.77
CTRL (3)	1.22318	15.4709	43.2887	2.78465	2681.2	11300.8	25.5244	274.149	5.06582	34.1243	3.38437	2205.76	1444.48	15.4445	150.206	32.3059	69.3252	52.1662	7290.19
CTRL (4)	1.37353	14.75	44.0634	2.11584	4586.15	90764.2	22.9045	148.119	4.60625	42.9475	2.93517	2167.87	1808.15	33.3201	195.74	29.1285	67.0645	36.2075	8380.85
CTRL (5)	1.37391	14.2696	43.3974	16.3285	711.515	6216.35	18.602	67.5587	5.57989	57.7728	2.77699	1771.89	286.94	34.513	446.183	27.3997	61.2407	59.4858	11838.3
o-Vanillin (1)	1.07353	16.9032	43.4517	2.28138	2721.55	2435.68	15.8465	74.1259	4.63067	10.7681	3.26302	1563.33	226.531	6.28817	0.506592	30.4044	62.3691	14.2778	3569.76
o-Vanillin (2)	0.923885	12.094	43.9956	1.0151	231.353	1234.55	39.7504	84.754	4.38291	13.965	3.02029	1808.73	2058.81	5.25758	4.15886	29.1363	71.4426	14.8768	3085.41
o-Vanillin (3)	1.07353	8.18618	24.1337	1.4175	421.765	2345.88	10.9069	46.2089	2.93461	12.8443	1.84755	553.321	22.8543	6.87427	12.6208	19.089	35.2071	15.9921	4491.24
o-Vanillin (4)	1.07353	14.0231	42.0651	0.656775	102.435	332.769	22.2447	88.4914	4.38291	14.4868	3.06884	1509.09	235.691	6.53281	2.6928	28.7062	4.0138	7.39947	2140.66
o-Vanillin (5)	0.627415	5.7018	18.6646	1.4175	107.765	628.269	4.86176	56.9954	4.12931	12.4809	0.743493	158.891	45.0184	5.79877	0.552401	20.0473	29.1694	12.3249	1801.62
RG-7112 (1)	0.925299	13.0622	41.1675	0.656775	3999.97	3825.81	18.0114	65.2351	4.48192	14.5983	3.11745	2052.07	169.056	7.01999	10.839	29.1285	57.1994	32.8134	6057.8
RG-7112 (2)	0.627415	9.16988	26.2099	1.4175	547.569	3271.35	10.1697	60.9173	2.75905	14.7191	1.62596	1810.44	49.1807	5.94584	10.2121	13.1363	37.1991	25.9285	1615.26
RG-7112 (3)	1.07353	18.8142	43.6421	1.35511	654.322	5549.23	25.5435	245.815	4.89826	25.8575	3.31163	2155	1128.03	12.693	80.3347	32.5183	67.9585	39.8224	5795.34
RG-7112 (4)	0.627415	1.60512	1.96454	0.656775	95.6573	204.692	1.99785	35.2726	0.440582	19.8897	0.325905	51.6889	8.12752	16.8596	173.258	1.12165	63.3672	61.8388	5009.36
RG-7112 (5)	1.07353	9.41494	8.91633	1.4175	128.433	860.395	10.01	37.7287	1.51213	19.7783	2.04398	262.851	19.6823	7.99159	160.9	7.49418	17.2293	51.5817	8371.72

## Sheet: Figure 3C
Pellets Samples (Fold change / CTRL)	IFN-gamma	IL-6	IL-8	CCL7	CCL24	CXCL1	CXCL5	CXCL9	CXCL10	VEGF-A
o-Vanillin (1)	0.756468	0.372958	0.0448547	0.40199	0.419282	0.936988	0.100964	0.406165	0.0644598	0.393102
o-Vanillin (2)	0.512485	0.0510554	0.0331227	0.384743	0.850409	0.969605	0.0142627	0.74408	0.132593	0.462989
o-Vanillin (3)	0.877656	0.244041	0.491082	0.896645	0.757745	0.976991	0.780926	0.821849	0.534829	0.79495
o-Vanillin (4)	0.456789	0.0208578	0.00225521	0.238138	0.463117	0.0238432	0.00449495	0.50599	0.885145	0.597715
o-Vanillin (5)	0.781371	0.180507	0.138408	0.558458	0.342346	0.148345	0.0685938	0.231553	0.360615	0.707174
RG-7112 (1)	0.877656	0.253757	0.0285565	0.456777	0.309272	0.713827	0.135289	0.363823	0.00301272	0.231648
RG-7112 (2)	0.754647	0.0215714	0.0124999	0.535291	0.806842	0.968687	0.597068	0.657949	0.053998	0.884381
RG-7112 (3)	0.877656	0.157305	0.2076	0.168554	0.376397	0.250853	0.0158218	0.445096	0.0840234	0.616066
RG-7112 (4)	0.781585	0.0223358	0.0036663	0.597436	0.337314	0.696115	0.13035	0.196062	0.0137571	0.255422
RG-7112 (5)	0.456664	0.151459	0.101067	0.843644	0.216034	0.0896732	0.156892	0.168017	0.00123806	0.152186
