# Supplementary material for: Senotherapeutic drugs for human intervertebral disc degeneration and low back pain
Source: eLife. 2020 Aug 21;9:e54693. doi: 10.7554/eLife.54693 (PMC7442487; doi:10.7554/eLife.54693)
Supplement: Figure 4—source data 1. [file elife-54693-fig4-data1.xlsx]

## Sheet: Figure 4B
Donor 1	slice number	voxel intensity		Average voxel intensity	1	2	3	4
CTL_pre	2	17286.2		CTL_pre	17752.7	22007.2	23204.8	19354.2
CTL_pre	3	17466.8		CTL_post	16947.7	19603.7	20738.6	14145
CTL_pre	4	17789.6		RG-7112_pre	17675.2	18644.1	19301.4	19225.4
CTL_pre	5	18213.7		RG-7112_post	18332	20239.4	21305.8	20150.8
CTL_pre	6	18007.3		O-Vanillin_pre	15286.2	17954	21446.6	16800.3
				O-Vanillin_post	16985.2	19911.2	23181.9	19208.4
CTL_post	2	16470.4
CTL_post	3	17304.5
CTL_post	4	17234.3
CTL_post	5	16682.8		Pecetage of change in (post/Pre) per disc	1	2	3	4
CTL_post	6	17046.3		CTL	-4.5348	-10.9215	-10.6283	-26.9153
				RG-7112	3.71595	8.55669	10.3848	4.81353
RG-7112_pre	2	17816.3		O-Vanillin	11.1148	10.901	8.09108	14.3335
RG-7112_pre	3	17495.4
RG-7112_pre	4	18427.5
RG-7112_pre	5	17727.6		Average (n=4 discs)	Average	std	n	smem
RG-7112_pre	6	16909.2		CTL	-13.25	9.57411	4	4.78705
				RG-7112	6.86773	3.12919	4	1.5646
RG-7112_post	2	19495.3		O-Vanillin	11.1101	2.55266	4	1.27633
RG-7112_post	3	19517.4
RG-7112_post	4	19765.4
RG-7112_post	5	17870.7
RG-7112_post	6	15011.2
O-Vanillin_pre	2	14672.2
O-Vanillin_pre	3	15183.1
O-Vanillin_pre	4	15550.6
O-Vanillin_pre	5	15522.9
O-Vanillin_pre	6	15502.1
O-Vanillin_post	2	15937.6
O-Vanillin_post	3	16391
O-Vanillin_post	4	17480.2
O-Vanillin_post	5	17749.2
O-Vanillin_post	6	17368.1
Donor 2
CTL_pre	2	23310.2
CTL_pre	3	21772.3
CTL_pre	4	22308.9
CTL_pre	5	20870.7
CTL_pre	6	21773.8
CTL_post	2	19624.1
CTL_post	3	20076.2
CTL_post	4	20199
CTL_post	5	18779.7
CTL_post	6	19339.5
RG-7112_pre	0	13940.8
RG-7112_pre	1	18890.4
RG-7112_pre	2	18030.6
RG-7112_pre	3	19218
RG-7112_pre	4	20278.8
RG-7112_pre	5	20571.2
RG-7112_pre	6	19579.2
RG-7112_post	0	17669.2
RG-7112_post	1	19814.4
RG-7112_post	2	19114.8
RG-7112_post	3	21782.7
RG-7112_post	4	21984
RG-7112_post	5	22856.9
RG-7112_post	6	18454.2
O-Vanillin_pre	1	19372.4
O-Vanillin_pre	2	20731.4
O-Vanillin_pre	3	19695.4
O-Vanillin_pre	4	16417.5
O-Vanillin_pre	5	15993.7
O-Vanillin_pre	6	15513.9
O-Vanillin_post	1	19534.1
O-Vanillin_post	2	20980.1
O-Vanillin_post	3	19814.7
O-Vanillin_post	4	19928
O-Vanillin_post	5	19455.7
O-Vanillin_post	6	19754.6
Donor 3
CTL_pre	2	24339.4
CTL_pre	3	22105.5
CTL_pre	4	23144.1
CTL_pre	5	23002.2
CTL_pre	6	23433
CTL_post	2	20750.6
CTL_post	3	20188.8
CTL_post	4	193598
CTL_post	5	20886.2
CTL_post	6	20590.9
RG-7112_pre	1	18272.8
RG-7112_pre	2	20184.2
RG-7112_pre	3	19927.8
RG-7112_pre	4	19784.9
RG-7112_pre	5	18207.4
RG-7112_pre	6	19431.4
RG-7112_post	1	20113
RG-7112_post	2	22229.9
RG-7112_post	3	21029.1
RG-7112_post	4	21451.7
RG-7112_post	5	21035.4
RG-7112_post	6	21975.8
O-Vanillin_pre	1	20877.4
O-Vanillin_pre	2	22191
O-Vanillin_pre	3	21714.6
O-Vanillin_pre	4	21872.4
O-Vanillin_pre	5	20577.8
O-Vanillin_post	1	22807.7
O-Vanillin_post	2	21986.2
O-Vanillin_post	3	23524.6
O-Vanillin_post	4	23658.3
O-Vanillin_post	5	23932.6
Donor 4
CTL_pre	1	14426.1
CTL_pre	2	20654.2
CTL_pre	3	20862.8
CTL_pre	4	21310.1
CTL_pre	5	19267.1
CTL_pre	6	19604.9
CTL_post	1	14022.8
CTL_post	2	14819.5
CTL_post	3	15090.2
CTL_post	4	13961
CTL_post	5	13633.6
CTL_post	6	13342.7
RG-7112_pre	1	17648.6
RG-7112_pre	2	20499.8
RG-7112_pre	3	20508
RG-7112_pre	4	19681.4
RG-7112_pre	5	18184.3
RG-7112_pre	6	18830.3
RG-7112_post	1	18566.7
RG-7112_post	2	20836.4
RG-7112_post	3	21206.5
RG-7112_post	4	20582.6
RG-7112_post	5	19788.5
RG-7112_post	6	19924.3
O-Vanillin_pre	1	12498.7
O-Vanillin_pre	2	17037
O-Vanillin_pre	3	18531.3
O-Vanillin_pre	4	19063.3
O-Vanillin_pre	5	17132.3
O-Vanillin_pre	6	16539.4
O-Vanillin_post	1	17197.7
O-Vanillin_post	2	19600
O-Vanillin_post	3	20211.1
O-Vanillin_post	4	20371.3
O-Vanillin_post	5	19210.7
O-Vanillin_post	6	18659.6

## Sheet: Figure 4E
	Percentage of p16 positive cells
		CTRL	RG-7112	O-Vanillin
	Disc 1	47.0437	32.0797	14
	Disc 2	43.0636	21.1712	25.1701
	Disc 3	27.1333	11.8421	10.0381
	Disc 4	39.0835	21.7024	16.5102

## Sheet: Figure 4F
	Percentage of Ki-67 positive cells
		CTRL	RG-7112	O-Vanillin
	Disc 1	7.8	2.1	8
	Disc 2	5	17	17
	Disc 3	5	5	4
	Disc 4	2	7.9	3
