# Supplementary material for: Senotherapeutic drugs for human intervertebral disc degeneration and low back pain
Source: eLife. 2020 Aug 21;9:e54693. doi: 10.7554/eLife.54693 (PMC7442487; doi:10.7554/eLife.54693)
Supplement: Figure 5—figure supplement 1—source data 1. [file elife-54693-fig5-figsupp1-data1.xlsx]

## Sheet: Figure S4A
CTRL post/ pre	Disc 1	Disc 2	Disc 3	Disc 4		CTRL post/ pre	Average	STD	N	SMEM
CXCL5	-3.46211	-23.7256	-41.2156	64.5135		CXCL5	-0.972451	46.3027	4	23.1513
G-CSF						G-CSF	NOISE	NOISE	NOISE	NOISE
GM-CSF			-54.3414			GM-CSF			1
GRO a/b/g	66.7227	-25.8613	-26.8472	42.9953		GRO a/b/g	14.2524	47.8803	4	23.9402
CXCL1	262.542	38.3641	-30.0829	128.497		CXCL1	99.8302	126.428	4	63.2142
CCL1			23.5898	-19.2647		CCL1	2.16255	30.3027	2	21.4273
IL-1 alpha		78.8863	-37.1639	0.669568		IL-1 alpha	14.1307	59.1846	3	34.1702
IL-1 beta	-11.1676	-6.1391	-35.0209	37.396		IL-1 beta	-3.73291	30.175	4	15.0875
IL-2						IL-2	NOISE	NOISE	NOISE	NOISE
IL-3	18.2206		-28.0533	20.7122		IL-3	3.6265	27.4638	3	15.8562
IL-4						IL-4	NOISE	NOISE	NOISE	NOISE
IL-5						IL-5	NOISE	NOISE	NOISE	NOISE
IL-6	1096.01	-9.17425	268.738	767.865		IL-6	530.859	495.281	4	247.64
IL-7	26.2234	-3.71512	20.8458	50.7407		IL-7	23.5237	22.3397	4	15.7965
IL-8	5.04844	18.9336	-36.3238	18.7861		IL-8	1.61108	26.1147	4	13.0573
IL-10						IL-10	NOISE	NOISE	NOISE	NOISE
IL-12		9.91263	-17.5466	0.69089		IL-12	-2.31437	13.9741	3	8.06798
IL-13			-50.0231	215.87		IL-13			2
IL-15		-32.1475	-14.7533	99.9483		IL-15	17.6825	71.7731	3	41.4382
IFN-gamma						IFN-gamma	NOISE	NOISE	NOISE	NOISE
CCL2	34.2715	32.6765	-8.36194	154.905		CCL2	53.3728	70.5058	4	35.2529
CCL8		-71.6497	-40.5478	41.1215		CCL8	-23.692	58.2445	3	33.6275
CCL7		-68.473	-40.2895	188.242		CCL7	26.4932	140.786	3	81.2826
M-CSF		-56.9698	0.00166669	199.393		M-CSF	47.4751	134.614	3	77.7192
CCL22	-11.8923	-79.0493	-38.3798	81.5026		CCL22	-11.9547	68.1524	3	39.3478
CXCL9	-70.4617	-34.8904	-42.3039	6.72676		CXCL9	-35.2323	31.8946	4	15.9473
CCL4	9.20018	34.3289	-42.6641	74.6754		CCL4	18.8851	49.1025	4	24.5513
MIP-1 delta						MIP-1 delta	NOISE	NOISE	NOISE	NOISE
CCL5	8.91799	-27.7887	-24.7815	27.7869		CCL5	-3.96632	26.9261	4	13.4631
SCF		-40.0301	10.5348			SCF	-14.7476	35.7548	2	25.2825
SDF-1 alpha		-38.6559	-4.99233			SDF-1 alpha	-21.8241	23.8037	2	16.8318
CCL17	-7.76307	-54.6279	13.495			CCL17	-16.2986	34.8543	3	20.1232
TGF beta 1						TGF beta 1	NOISE	NOISE	NOISE	NOISE
TNF-alpha						TNF-alpha	NOISE	NOISE	NOISE	NOISE
TNF-beta						TNF-beta	NOISE	NOISE	NOISE	NOISE
EGF		-53.2953	-29.2237	92.0838		EGF	3.18827	77.9209	3	44.9877
IGF-1	12.8062	-29.6541	-15.7511	3.39657		IGF-1	-7.30061	19.0596	4	9.52979
Angiogenin	-19.2287	-8.58429	-31.7052	10.7536		Angiogenin	-12.1911	17.9796	4	8.9898
OSM	51.0948	4.98698	5.6787	79.7795		OSM	35.385	36.625	4	18.3125
TPO		-55.1554	-5.13074			TPO	-30.1431	35.3728	2	25.0123
VEGF-A	41.9562	6.66737	-1.41374	74.9261		VEGF-A	30.534	35.078	4	17.539
PDGF-BB		-64.5322	12.548			PDGF-BB	-25.9921	54.5039	2	38.5401
Leptin						Leptin	NOISE	NOISE	NOISE	NOISE
BDNF	-3.21183	-33.422	-21.7605	-9.31311		BDNF	-16.9268	13.4353	4	6.71766
CXCL13		-62.3907	-15.682	32.8249		CXCL13	-15.0826	47.6106	3	27.488
CCL23		-65.1189	-42.9405			CCL23	-54.0297	15.6825	2	11.0892
CCL11	-19.9662	-51.2832	-24.6204			CCL11	-31.9566	16.8983	3	9.75626
CCL24	-38.0945	-44.8043	1.97733	119.519		CCL24	9.64928	76.1025	4	38.0513
CCL26	-35.6626	-53.1177	-13.5528			CCL26	-34.111	19.828	3	11.4477
FGF-4		11.218	7.67572	102.138		FGF-4	40.3439	53.5445	3	30.9139
FGF-6	-13.0334	-36.6058	2.96829			FGF-6	-15.5569	19.9074	3	11.4935
FGF-7		-55.433	-8.5272	337.017		FGF-7	91.0188	214.327	3	123.742
FGF-9	-15.6124	-6.97777	9.6465	69.3918		FGF-9	14.112	38.315	4	19.1575
FLT-3 Ligand		-69.7495	-9.0598			FLT-3 Ligand	-39.4046	42.9141	2	30.3448
CX3CL1	-3.70918	-60.0572	-27.4211			CX3CL1	-30.3958	28.2915	3	16.3341
CXCL6	316.14	5.19885	91.4761	374.774		CXCL6	196.897	176.749	4	88.3747
GDNF	-2.2944	-50.4001	-29.071			GDNF	-27.2552	24.1042	3	13.9166
HGF	78.3642	-18.5216	-21.1216	162.009		HGF	50.1825	87.7571	4	43.8786
IGFBP-1	-48.0704	-46.396	7.32476			IGFBP-1	-29.0472	31.5102	3	18.1924
IGFBP-2	84.9539	17.9796	-0.619146	54.7352		IGFBP-2	39.2624	38.169	4	19.0845
IGFBP-3	3.16338	8.16904	58.8666			IGFBP-3	23.3997	30.8171	3	17.7922
IGFBP-4	-12.8283	31.2274	31.36	21.279		IGFBP-4	17.7595	20.9313	4	10.4656
IL16	-33.8337	-31.1996	10.4262	67.753		IL16	3.28646	47.5188	4	23.7594
CXCL10	-48.9649	-18.5313	11.387	84.9244		CXCL10	7.20379	57.3737	4	28.6868
LIF	4.81666	-22.1049	-5.91948	60.1106		LIF	9.22573	35.6824	4	17.8412
LIGHT TNFSF-14	4.59539	-53.561	-28.218	85.5681		LIGHT TNFSF-14	2.09613	60.5268	4	30.2634
CCL13	-46.4869	-63.2774	-46.6255	255.757		CCL13	24.8417	154.145	4	77.0725
MIF	-10.485	-54.399	-5.29035	166.948		MIF	24.1935	97.686	4	48.843
MIP-3 alpha	-52.2285	-68.1221	-11.9859	493.78		MIP-3 alpha	90.3608	269.982	4	134.991
CXCL7	-38.672	-39.3982	-48.6562	22.4969		CXCL7	-26.0574	32.687	4	16.3435
NT-3	-34.3643	-26.9601	-28.0522	35.5058		NT-3	-13.4677	32.8117	4	16.4059
NT-4	9.53285	-2.24146	51.7961	30.2216		NT-4	22.3273	23.7911	4	11.8956
OPN (SPP1)	70.1757	219.628	39.7795	39.8597		OPN (SPP1)	92.3608	86.0432	4	43.0216
OPG	17.4013	7.29942	-4.16887	9.24381		OPG	7.44391	8.89318	4	4.44659
PARC	-9.09242	-31.9808	14.6374	93.862		PARC	16.8566	54.7516	4	27.3758
PLGF		6.06778	-5.49361	108.354		PLGF	36.3093	62.6595	3	36.1765
TGF-beta-2	4.9957	-18.1204	7.5132	52.4248		TGF-beta-2	11.7033	29.4971	4	14.7486
TGF-beta-3		-36.7308	-16.4723	101.688		TGF-beta-3	16.1615	74.7573	3	43.1611
TIMP1	-9.52379	-46.8465	-28.403	64.6634		TIMP1	-5.02748	48.8954	4	24.4477
TIMP2	-25.6301	-7.38197	-19.7302	33.1964		TIMP2	-4.88649	26.5026	4	13.2513

## Sheet: Figure S4B
O-Vanillin post/ pre	Disc 1	Disc 2	Disc 3	Disc 4		O-Vanillin post/ pre	Average	STD	N	SMEM
CXCL5	-21.4723	14.5971	110.134	-66.2786		CXCL5	9.24497	74.9546	4	37.4773
G-CSF						G-CSF	NOISE	NOISE	NOISE	NOISE
GM-CSF						GM-CSF	NOISE	NOISE	NOISE	NOISE
GRO a/b/g	-46.6779	-45.8187	-42.5464	-32.3098		GRO a/b/g	-41.8382	6.59694	4	3.29847
CXCL1	-70.9432	-35.9209	-66.5436	-88.412		CXCL1	-65.4549	21.8372	4	10.9186
CCL1						CCL1	NOISE	NOISE	NOISE	NOISE
IL-1 alpha						IL-1 alpha	NOISE	NOISE	NOISE	NOISE
IL-1 beta	0.127822	-3.09671		-13.4402		IL-1 beta	-5.4697	7.08845	3	4.09252
IL-2	31.2853					IL-2	31.2853		1
IL-3	23.8622			-22.4758		IL-3	0.693212	32.7659	2	23.169
IL-4	-18.0863					IL-4	-18.0863		1
IL-5						IL-5	NOISE	NOISE	NOISE	NOISE
IL-6	-91.6732	8.23386	-63.3252	-87.9641		IL-6	-58.6822	46.3507	4	23.1753
IL-7	-62.5458	-90.1766	-89.5547	-91.2135		IL-7	-83.3726	13.9014	4	6.95069
IL-8	-17.0031	-6.36564	-12.5436	-11.1052		IL-8	-11.7544	4.38299	4	2.1915
IL-10						IL-10	NOISE	NOISE	NOISE	NOISE
IL-12	-16.8584					IL-12	-16.8584		1
IL-13						IL-13	NOISE	NOISE	NOISE	NOISE
IL-15	17.5231			-14.7059		IL-15	1.40862	22.7894	2	16.1145
IFN-gamma				-22.51		IFN-gamma	-22.51		1
CCL2	-44.7082	-58.1806	-7.0239	-49.7644		CCL2	-39.9193	22.6233	4	11.3116
CCL8	33.4413					CCL8	33.4413		1
CCL7	-19.8538			-41.387		CCL7	-30.6204	15.2263	2	10.7666
M-CSF	-37.7719	4.8627	23.1889	-26.3568		M-CSF	-9.01927	28.032	4	14.016
CCL22	-32.3624	-36.6388	84.1227	-6.02045		CCL22	2.27525	56.2195	4	28.1097
CXCL9	23.472	-33.4453	61.8995	-38.635		CXCL9	3.3228	48.1303	4	24.0651
CCL4	-20.949	-57.8932	139.447	-57.7768		CCL4	0.707109	94.1138	4	47.0569
MIP-1 delta						MIP-1 delta	NOISE	NOISE	NOISE	NOISE
CCL5	29.3359					CCL5	29.3359		1
SCF	63.5968					SCF	63.5968		1
SDF-1 alpha	24.3848			-1.38272		SDF-1 alpha	11.501	18.2204	2	12.8837
CCL17	41.3734			-6.86124		CCL17	17.2561	34.107	2	24.1173
TGF beta 1						TGF beta 1	NOISE	NOISE	NOISE	NOISE
TNF-alpha						TNF-alpha	NOISE	NOISE	NOISE	NOISE
TNF-beta	-1.13798					TNF-beta	-1.13798		1
EGF	-16.0913	14.2474	20.318	32.7988		EGF	12.8182	20.7627	4	10.3814
IGF-1	-8.02724	-13.1023	48.2836	-9.50329		IGF-1	4.4127	29.3249	4	14.6624
Angiogenin	-7.59671	-37.1393	30.7435	0.211893		Angiogenin	-3.44515	27.8973	4	13.9486
OSM	30.974	28.8505	-17.3043			OSM	14.1734	27.2812	3	15.7508
TPO	58.0647					TPO	58.0647		1
VEGF-A	-17.5375	-12.5964	24.8622	40.9874		VEGF-A	8.92889	28.5507	4	14.2753
PDGF-BB	140.079					PDGF-BB	140.079		1
Leptin				-46.4319		Leptin	-46.4319		1
BDNF	30.2109	50.1834	-17.5292	0.900901		BDNF	15.9415	30.1255	4	15.0627
CXCL13	64.1476	39.2339	-35.1038			CXCL13	22.7592	51.6359	3	29.812
CCL23	67.608		8.54573			CCL23	38.0769	41.7634	2	29.5312
CCL11	4.42839			43.554		CCL11	23.9912	27.666	2	19.5628
CCL24	7.67615	-4.55522	-3.65757	-14.5231		CCL24	-3.76492	9.07876	4	4.53938
CCL26	-11.1887			-42.0698		CCL26	-26.6292	21.8362	2	15.4405
FGF-4	38.4744					FGF-4	38.4744		1
FGF-6	70.0982					FGF-6	70.0982		1
FGF-7						FGF-7	NOISE	NOISE	NOISE	NOISE
FGF-9	45.2735	60.062	1.97017	23.372		FGF-9	32.6694	25.4172	4	12.7086
FLT-3 Ligand						FLT-3 Ligand	NOISE	NOISE	NOISE	NOISE
CX3CL1	134.088		-24.0122			CX3CL1	55.0378	111.794	2	79.05
CXCL6	-40.9972	-58.0086	-70.6307	-40.2547		CXCL6	-52.4728	14.621	4	7.31052
GDNF	48.0986	15.805	5.15844	20.8333		GDNF	22.4738	18.2904	4	9.14521
HGF	-3.41945			-14.4076		HGF	-8.91351	7.76979	2	5.49407
IGFBP-1	24.9892			-59.6885		IGFBP-1	-17.3496	59.8761	2	42.3388
IGFBP-2	-69.5015	-37.6889	-16.7305	-54.1284		IGFBP-2	-44.5123	22.6224	4	11.3112
IGFBP-3	12.2475					IGFBP-3	12.2475		1
IGFBP-4	-17.2632	-40.2026	-19.0705	51.9171		IGFBP-4	-6.1548	40.0908	4	20.0454
IL16	68.9574					IL16	68.9574		1
CXCL10	149.084	37.3109	27.9987	36.6501		CXCL10	62.7608	57.7047	4	28.8523
LIF	99.7443	69.0398	23.3686	18.0821		LIF	52.5587	38.8965	4	19.4482
LIGHT TNFSF-14	-23.5561	-24.3546	-28.4618	-19.4761		LIGHT TNFSF-14	-23.9622	3.68288	4	1.84144
CCL13	144.045		-16.3829	-38.847		CCL13	29.605	99.7424	3	57.5863
MIF		180.055		11.1946		MIF	95.6247	119.402	2	84.4301
MIP-3 alpha	72.2484			-53.8292		MIP-3 alpha	9.20958	89.1503	2	63.0388
CXCL7	105.87	50.1793	178.266	9.073		CXCL7	85.847	73.2771	4	36.6386
NT-3	39.8521	22.0848	94.4005	-77.895		NT-3	19.6106	71.9182	4	35.9591
NT-4	3.01151	37.2424				NT-4	20.127	24.2049	2	17.1154
OPN (SPP1)	-42.6828	-12.6309	-6.77053	-21.0343		OPN (SPP1)	-20.7796	15.7318	4	7.86591
OPG	16.0453	32.0781	-6.57349	21.1057		OPG	15.6639	16.2654	4	8.13268
PARC	82.6952		52.9385			PARC	67.8169	21.0412	2	14.8784
PLGF	70.4475			-4.47933		PLGF	32.9841	52.9813	2	37.4634
TGF-beta-2	59.3744	60.429	-13.6175	-17.6131		TGF-beta-2	22.1432	43.6324	4	21.8162
TGF-beta-3	67.1764		-21.4832	-40.9921		TGF-beta-3	1.56704	57.6506	3	33.2846
TIMP1	16.4855	3.26682	24.1741	3.11354		TIMP1	11.76	10.3816	4	5.19082
TIMP2	10.7333	-9.3809	6.47061	18.8178		TIMP2	6.66022	11.8568	4	5.9284

## Sheet: Figure S4C
RG-5 post/ pre	Disc 1	Disc 2	Disc 3	Disc 4		RG-5 post/ pre	Average	STD	N	SMEM
CXCL5	-63.6027	10.8662	106.828	-83.4138		CXCL5	-7.3306	86.2525	4	43.1263
G-CSF						G-CSF	NOISE	NOISE	NOISE	NOISE
GM-CSF						GM-CSF	NOISE	NOISE	NOISE	NOISE
GRO a/b/g	-33.1678	9.26507	-33.0105	-74.4854		GRO a/b/g	-32.8497	34.1922	4	17.0961
CXCL1	-35.5481	-11.0659	-11.9662	-88.3029		CXCL1	-36.7208	36.208	4	18.104
CCL1			-45.1766			CCL1	-45.1766		1
IL-1 alpha			-40.5019			IL-1 alpha	-40.5019		1
IL-1 beta	-6.46164		-41.0927			IL-1 beta	-23.7772	24.4879	2	17.3155
IL-2	21.3406		-49.0722			IL-2	-13.8658	49.7893	2	35.2064
IL-3	29.145		-41.7019			IL-3	-6.27847	50.0964	2	35.4235
IL-4						IL-4	NOISE	NOISE	NOISE	NOISE
IL-5						IL-5	NOISE	NOISE	NOISE	NOISE
IL-6	-30.4466	-37.1499	-76.2761	-93.7038		IL-6	-59.3941	30.5228	4	15.2614
IL-7	-35.758	-59.8769	-64.6859	-82.2211		IL-7	-60.6355	19.1643	4	9.58215
IL-8	-22.3139	-15.6988	-20.4865	-16.4185		IL-8	-18.7294	3.1865	4	1.59325
IL-10						IL-10	NOISE	NOISE	NOISE	NOISE
IL-12	50.4263		-53.2743	-19.186		IL-12	-7.34467	52.8547	3	30.5157
IL-13			-43.0679			IL-13	-43.0679		1
IL-15	33.5883		-60.8945			IL-15	-13.6531	66.8094	2	47.2414
IFN-gamma						IFN-gamma	NOISE	NOISE	NOISE	NOISE
CCL2	15.6622	46.3816	-20.4464	-28.1129		CCL2	3.37112	34.4456	4	17.2228
CCL8	47.1726		-42.5298			CCL8	2.32141	63.4292	2	44.8512
CCL7						CCL7	NOISE	NOISE	NOISE	NOISE
M-CSF	26.8098	4.59889	-62.145	15.5852		M-CSF	-3.78777	39.9476	4	19.9738
CCL22	-11.8087	-8.73995	-59.3571	17.9163		CCL22	-15.4974	32.1425	4	16.0712
CXCL9	-20.7796	-13.9871	-68.7024	46.874		CXCL9	-14.1488	47.4126	4	23.7063
CCL4	-34.7986	93.2673	54.1014	-75.2039		CCL4	9.34155	77.7673	4	38.8837
MIP-1 delta			-47.1698			MIP-1 delta	-47.1698		1
CCL5	52.1554		-29.0422	8.88846		CCL5	10.6672	40.628	3	23.4566
SCF	104.985		-42.5114			SCF	31.237	104.296	2	73.7484
SDF-1 alpha	52.4179		-43.2284			SDF-1 alpha	4.59473	67.6321	2	47.8231
CCL17	58.4218		-31.6922	270.628		CCL17	99.1192	155.215	3	89.6132
TGF beta 1						TGF beta 1	NOISE	NOISE	NOISE	NOISE
TNF-alpha						TNF-alpha	NOISE	NOISE	NOISE	NOISE
TNF-beta						TNF-beta	NOISE	NOISE	NOISE	NOISE
EGF	-17.8135	-13.3564	-47.0827	66.929		EGF	-2.83091	48.8533	4	24.4266
IGF-1	-18.3535	3.0001	-51.5085	78.7192		IGF-1	2.96431	55.2586	4	27.6293
Angiogenin	-6.36965	-8.38928	-20.6545	14.551		Angiogenin	-5.2156	14.6115	4	7.30573
OSM	118.446	-0.914128	-26.3874	-2.11477		OSM	22.2573	65.1905	4	32.5953
TPO			-21.2963	91.3027		TPO	35.0032	79.6195	2	56.2995
VEGF-A	76.5002	8.58229	-19.3075	30.7714		VEGF-A	24.1366	40.4775	4	20.2388
PDGF-BB			-32.2524			PDGF-BB	-32.2524		1
Leptin			-23.9422			Leptin	-23.9422		1
BDNF	12.569	-12.8288	-5.37217	161.192		BDNF	38.89	82.2283	4	41.1142
CXCL13	17.5882	-24.344		114.966		CXCL13	36.0702	71.4705	3	41.2635
CCL23	36.0726			83.0384		CCL23	59.5555	33.2098	2	23.4829
CCL11	-1.51613		-44.4172	43.1141		CCL11	-0.939744	43.7685	3	25.2697
CCL24	-43.9252	-29.9675	-45.86	-2.53383		CCL24	-30.5717	19.9878	4	9.9939
CCL26	-50.0326		-39.7387			CCL26	-44.8857	7.27886	2	5.14693
FGF-4			-32.1114	22.6331		FGF-4	-4.73916	38.7102	2	27.3723
FGF-6			-44.9816	100.352		FGF-6	27.6849	102.766	2	72.6666
FGF-7			-36.0335			FGF-7	-68.0167		1
FGF-9	45.1729	-1.99404	-31.9378	94.4673		FGF-9	26.4271	55.3627	4	27.6814
FLT-3 Ligand			-41.82			FLT-3 Ligand	-41.82		1
CX3CL1	1.21786		-15.3549	204.998		CX3CL1	63.6202	122.717	3	70.8504
CXCL6	-14.6257	-22.3511	-10.0045	-41.0732		CXCL6	-22.0136	13.6892	4	6.84458
GDNF	-9.06881	-17.4725	-8.49673	37.4304		GDNF	0.598092	24.8953	4	12.4477
HGF	2.96939			-10.1702		HGF	-3.60042	9.29112	2	6.56981
IGFBP-1	-31.8544		-41.5991	54.9449		IGFBP-1	-6.16954	53.1504	3	30.6864
IGFBP-2	80.899	15.3807	-65.4122	-45.4631		IGFBP-2	-3.64892	66.0141	4	33.0071
IGFBP-3			-41.1371	33.1499		IGFBP-3	-3.99359	52.5289	2	37.1435
IGFBP-4			-44.4026	20.7793		IGFBP-4	-11.8117	46.0906	2	32.591
IL16	55.8317		-37.2228	233.821		IL16	84.1433	137.722	3	79.5139
CXCL10	39.1038	25.2237	-33.5469	104.726		CXCL10	33.8766	56.7678	4	28.3839
LIF	-3.26034	-5.46674	-39.3234	135.342		LIF	21.823	77.4585	4	38.7292
LIGHT TNFSF-14	-13.9142	-7.23268	-39.5785	-22.0154		LIGHT TNFSF-14	-20.6852	13.9707	4	6.98536
CCL13	-35.7035		-49.7955	46.7395		CCL13	-12.9198	52.1447	3	30.1058
MIF	-47.4815		-46.6645			MIF	-47.073	0.577703	2	0.408498
MIP-3 alpha	-54.5455			-52.9424		MIP-3 alpha	-69.1626	26.718	2	18.8925
CXCL7	-45.0771	-63.4452	23.9273	30.1328		CXCL7	-13.6155	47.5962	4	23.7981
NT-3	-33.2775	-14.7878	-13.7995	0.904325		NT-3	-15.2401	14.0032	4	7.00161
NT-4			-69.8694			NT-4	-69.8694		1
OPN (SPP1)	154.696	25.1081	-35.1886	-4.15839		OPN (SPP1)	35.1142	83.4359	4	41.718
OPG	23.144	-12.9687	-23.9519	6.65255		OPG	-1.78101	20.8893	4	10.4447
PARC			-51.0836			PARC	-51.0836		1
PLGF	22.267	61.9882	-58.0143	311.952		PLGF	84.5482	159.608	4	79.8042
TGF-beta-2	-8.82198	2.14371		50.8652		TGF-beta-2	14.729	31.7715	3	18.3433
TGF-beta-3	-43.5737	7.54904		155.424		TGF-beta-3	39.7998	103.345	3	59.6661
TIMP1	-11.7001	-15.3089	-22.3862	39.3115		TIMP1	-2.52091	28.2393	4	14.1197
TIMP2	-18.8716	-9.80222	-26.4195	39.5883		TIMP2	-3.87627	29.7621	4	14.881

## Sheet: Figure S4D
	Samples	IL1-alpha	IL1-beta	IL-6	IL-8	CCL7	CCL5	CCL26	CXCL5	CXCL11	CX3CL1
	CTRL- Disc 1 -PRE	10.0164	1.98975	702.198	2228.09	56.4175	9.24806	6.19891	1045.37	15.0265	22.7567
	CTRL- Disc 2 -PRE	21.1089	1.77582	4828.27	11300	52.7642	11.9928	1.99489	196.719	18.5908	32.7454
	CTRL- Disc 3 -PRE	10.8212	2.78465	774.325	1988.48	105.934	8.53955	12.3615	493.402	15.0265	22.8652
	CTRL- Disc 4-PRE	9.23624	0.656775	269.149	1591.67	68.3127	6.79064	8.55668	967.699	12.8348	20.4761
	CTRL- Disc 1 -POST	16.7375	1.94754	2429.81	2350.42	140.126	9.38864	6.27062	1376.54	22.2004	31.2488
	CTRL- Disc 2 -POST	27.0067	6.52107	10725	14557.6	83.7055	20.5872	2.77701	329.027	20.0617	41.2578
	CTRL- Disc 3 -POST	14.5169	2.9502	1897.96	2443.12	108.707	10.0325	12.3379	846.902	16.0712	27.8998
	CTRL- Disc 4-POST	37.6853	3.1056	10725	16522	122.743	26.3474	9.68243	2061.27	31.0516	56.9428
	O-Vanillin - Disc 1-PRE	17.4646	1.75751	1656.42	3071.19	130.705	9.34389	8.95992	1544.65	14.4864	31.5996
	O-Vanillin - Disc 2-PRE	31.4555	10.9247	10725	22157.6	78.0239	23.3481	2.77699	1271.42	23.8076	48.0905
	O-Vanillin - Disc 3-PRE	12.4064	2.78465	2329.52	2889.99	95.1613	7.90614	11.9964	756.809	14.4986	25.41
	O-Vanillin - Disc 4-PRE	38.801	2.44464	7899.23	11300	113.898	21.2906	11.7844	4205.32	30.8416	63.4541
	O-Vanillin - Disc 1-POST	12.0789	1.4175	671.263	2555.5	62.5958	9.98816	6.89139	1497.98	12.2463	28.2579
	O-Vanillin - Disc 2-POST	24.0923	1.4175	5772.64	11300	56.3967	12.6044	2.31336	317.164	21.965	36.5706
	O-Vanillin - Disc 3-POST	13.8377	1.77582	1158.47	2226.29	92.4664	8.49127	10.9234	301.275	13.9586	24.7774
	O-Vanillin - Disc 4-POST	12.6337	2.11584	1158.08	3349.55	70.778	8.96863	5.67241	617.185	13.9586	26.1412
	RG7112- Disc 1-PRE	21.9253	1.98975	1322.51	1168.92	64.2008	12.9397	2.75265	2810.52	16.0712	40.2161
	RG7112- Disc 2-PRE	29.8562	6.82436	10725	21511.5	80.0347	22.3537	2.06851	545.358	19.5491	43.747
	RG7112- Disc 3-PRE	13.9807	2.11584	2334.99	3566.29	80.4509	9.27398	7.32022	1259.87	17.5935	27.6346
	RG7112- Disc 4-PRE	40.1206	2.11584	10725	11300	99.3983	60.048	8.15297	5923.09	28.7052	64.2745
	RG7112- Disc 1-POST	7.31221	0.254376	318.981	10802.8	47.5881	5.15292	0.793856	255.341	4.69399	13.5479
	RG7112- Disc 2-POST	25.4686	3.25232	9361.57	11300	51.1744	13.1484	2.92303	475.219	25.6284	38.4021
	RG7112- Disc 3-POST	12.2924	1.4175	1186.07	1928.47	74.1163	8.68269	4.64003	294.43	13.4047	22.758
	RG7112- Disc 4-POST	11.7369	1.05917	661.914	2935.4	56.9954	8.00451	5.60057	636.274	12.8646	25.3028
