# Supplementary material for: Senotherapeutic drugs for human intervertebral disc degeneration and low back pain
Source: eLife. 2020 Aug 21;9:e54693. doi: 10.7554/eLife.54693 (PMC7442487; doi:10.7554/eLife.54693)
Supplement: Figure 5—source data 1. [file elife-54693-fig5-data1.xlsx]

## Sheet: Figure 5A
O-Vanillin post/ pre	Disc 1	Disc 2	Disc 3	Disc 4		O-Vanillin post/ pre	Average	STD	N	SMEM
IL-6	-91.6732	8.23386	-63.3252	-87.9641		IL-6	-58.6822	46.3507	4	23.1753
IL-7	-62.5458	-90.1766	-89.5547	-91.2135		IL-7	-83.3726	13.9014	4	6.95069
IL-8	-17.0031	-6.36564	-12.5436	-11.1052		IL-8	-11.7544	4.38299	4	2.1915
CXCL1	-70.9432	-35.9209	-66.5436	-88.412		CXCL1	-65.4549	21.8372	4	10.9186
CXCL6	-40.9972	-58.0086	-70.6307	-40.2547		CXCL6	-52.4728	14.621	4	7.31052
CXCL9	23.472	-33.4453	61.8995	-38.635		CXCL9	3.3228	48.1303	4	24.0651
CCL2	-44.7082	-58.1806	-7.0239	-49.7644		CCL2	-39.9193	22.6233	4	11.3116
CCL22	-32.3624	-36.6388	84.1227	-6.02045		CCL22	2.27525	56.2195	4	28.1097
CCL24	7.67615	-4.55522	-3.65757	-14.5231		CCL24	-3.76492	9.07876	4	4.53938
GRO a/b/g	-46.6779	-45.8187	-42.5464	-32.3098		GRO a/b/g	-41.8382	6.59694	4	3.29847
IGFBP-2	-69.5015	-37.6889	-16.7305	-54.1284		IGFBP-2	-44.5123	22.6224	4	11.3112
LIGHT TNFSF-14	-23.5561	-24.3546	-28.4618	-19.4761		LIGHT TNFSF-14	-23.9622	3.68288	4	1.84144
OPN (SPP1)	-42.6828	-12.6309	-6.77053	-21.0343		OPN (SPP1)	-20.7796	15.7318	4	7.86591
NT-3	39.8521	22.0848	94.4005	-77.895		NT-3	19.6106	71.9182	4	35.9591
OPG	16.0453	32.0781	-6.57349	21.1057		OPG	15.6639	16.2654	4	8.13268
RG-5 post/ pre	Disc 1	Disc 2	Disc 3	Disc 4		RG-5 post/ pre	Average	STD	N	SMEM
IL-6	-30.4466	-37.1499	-76.2761	-93.7038		IL-6	-59.3941	30.5228	4	15.2614
IL-7	-35.758	-59.8769	-64.6859	-82.2211		IL-7	-60.6355	19.1643	4	9.58215
IL-8	-22.3139	-15.6988	-20.4865	-16.4185		IL-8	-18.7294	3.1865	4	1.59325
CXCL1	-35.5481	-11.0659	-11.9662	-88.3029		CXCL1	-36.7208	36.208	4	18.104
CXCL6	-14.6257	-22.3511	-10.0045	-41.0732		CXCL6	-22.0136	13.6892	4	6.84458
CXCL9	-20.7796	-13.9871	-68.7024	46.874		CXCL9	-14.1488	47.4126	4	23.7063
CCL2	15.6622	46.3816	-20.4464	-28.1129		CCL2	3.37112	34.4456	4	17.2228
CCL22	-11.8087	-8.73995	-59.3571	17.9163		CCL22	-15.4974	32.1425	4	16.0712
CCL24	-43.9252	-29.9675	-45.86	-2.53383		CCL24	-30.5717	19.9878	4	9.9939
GRO a/b/g	-33.1678	9.26507	-33.0105	-74.4854		GRO a/b/g	-32.8497	34.1922	4	17.0961
IGFBP-2	80.899	15.3807	-65.4122	-45.4631		IGFBP-2	-3.64892	66.0141	4	33.0071
LIGHT TNFSF-14	-13.9142	-7.23268	-39.5785	-22.0154		LIGHT TNFSF-14	-20.6852	13.9707	4	6.98536
OPN (SPP1)	154.696	25.1081	-35.1886	-4.15839		OPN (SPP1)	35.1142	83.4359	4	41.718
NT-3	-33.2775	-14.7878	-13.7995	0.904325		NT-3	-15.2401	14.0032	4	7.00161
OPG	23.144	-12.9687	-23.9519	6.65255		OPG	-1.78101	20.8893	4	10.4447

## Sheet: Figure 5B
	CTRL post/ pre	Disc 1	Disc 2	Disc 3	Disc 4		CTRL post/ pre	Average	STD	N	SMEM
	IL-6	1096.01	-9.17425	268.738	767.865		IL-6	530.859	495.281	4	247.64
	IL-7	26.2234	-3.71512	20.8458	50.7407		IL-7	23.5237	22.3397	4	11.1698
	IL-8	5.04844	18.9336	-36.3238	18.7861		IL-8	1.61108	26.1147	4	13.0573
	CXCL1	262.542	38.3641	-30.0829	128.497		CXCL1	99.8302	126.428	4	63.2142
	CXCL6	316.14	5.19885	91.4761	374.774		CXCL6	196.897	176.749	4	88.3747
	CXCL9	-70.4617	-34.8904	-42.3039	6.72676		CXCL9	-35.2323	31.8946	4	15.9473
	CCL2	34.2715	32.6765	-8.36194	154.905		CCL2	53.3728	70.5058	4	35.2529
	CCL22	-11.8923	-79.0493	-38.3798	81.5026		CCL22	-11.9547	68.1524	4	34.0762
	CCL24	-38.0945	-44.8043	1.97733	119.519		CCL24	9.64928	76.1025	4	38.0513
	GRO a/b/g	66.7227	-25.8613	-26.8472	42.9953		GRO a/b/g	14.2524	47.8803	4	23.9402
	IGFBP-2	84.9539	17.9796	-0.619146	54.7352		IGFBP-2	39.2624	38.169	4	19.0845
	LIGHT TNFSF-14	4.59539	-53.561	-28.218	85.5681		LIGHT TNFSF-14	2.09613	60.5268	4	30.2634
	OPN (SPP1)	70.1757	219.628	39.7795	39.8597		OPN (SPP1)	92.3608	86.0432	4	43.0216
	NT-3	-34.3643	-26.9601	-28.0522	35.5058		NT-3	-13.4677	32.8117	4	16.4059
	OPG	17.4013	7.29942	-4.16887	9.24381		OPG	7.44391	8.89318	4	4.44659

## Sheet: Figure 5C
	Fold change pre/post-Discs
	Samples	VEGF-A	CCL26	CXCL1	CCL11	CCL7	CCL24	CXCL5	CXCL9	CXCL10	IL-8	Angiogenin	IL1-alpha	CX3CL1	CCL5	IL-6	CXCL11	TNF-alpha	IFN-gamma	IL1-beta
	CTRL - Disc 1	1.79722	1.01157	5.72891	4.63372	2.48374	16.3645	1.31679	2.24675	0.826521	1.0549	1.45742	1.67101	1.37317	1.0152	3.46029	1.47742	2.57543	1.32512	0.978786
	CTRL - Disc 2	4.60106	1.39206	1.92493	5.25162	1.58641	7.19423	1.67257	5.82287	0.0755569	1.28828	0.936092	1.2794	1.25996	1.71663	2.22129	1.07912	0.953972	1.28162	3.67214
	CTRL - Disc 3	1.05105	0.998095	4.51354	1.69122	1.02617	2.02457	1.71646	3.19545	0.645145	1.22864	1.77905	1.34152	1.22019	1.17482	2.45111	1.06953	1.19164	1.42102	1.05945
	CTRL - Disc 4	1.22683	1.13156	5.96543	1.54411	1.79678	2.34272	2.13007	2.55631	1.64576	10.3803	1.81347	4.08015	2.78094	3.87995	39.8478	2.41932	2.6659	1.81608	4.72857
	O-Vanillin - Disc 1	0.745397	0.769135	0.31977	0.180789	0.478908	0.11197	0.969787	0.352395	0.493115	0.832088	0.856025	0.691623	0.894247	1.06895	0.405249	0.845361	0.51256	0.672449	0.806538
	O-Vanillin - Disc 2	0.77342	0.833046	0.438142	0.413383	0.722813	0.244349	0.249457	0.459442	0.418668	0.509982	0.831129	0.765918	0.760453	0.539847	0.538242	0.922603	0.919533	0.781371	0.129752
	O-Vanillin - Disc 3	0.98273	0.910557	0.472195	0.51828	0.971681	0.462822	0.398086	0.438308	0.627917	0.770345	0.664677	1.11537	0.975108	1.07401	0.497302	0.962752	0.868331	0.819638	0.637718
	O-Vanillin - Disc 4	0.868453	0.48135	0.479554	0.778879	0.621417	0.276582	0.146763	0.28998	0.537591	0.296421	0.641401	0.325604	0.41197	0.421248	0.146607	0.45259	0.403736	0.57392	0.865499
	RG7112 - Disc 1	0.263158	0.288398	0.419067	0.34576	0.741238	0.21626	0.0908517	0.381543	0.841457	9.24164	0.801291	0.333505	0.336878	0.398227	0.241193	0.292074	0.472041	0.48195	0.127844
	RG7112 - Disc 2	0.175138	1.41311	0.599508	0.711562	0.639403	0.500578	0.871388	0.488112	0.464568	0.525302	0.797275	0.853043	0.877823	0.588198	0.872873	1.31098	0.578042	0.378011	0.476576
	RG7112 - Disc 3	0.835349	0.633865	0.66835	0.556203	0.921262	0.609196	0.233698	0.558838	0.861463	0.54075	0.744761	0.879241	0.823531	0.936243	0.507953	0.76191	0.769382	0.891078	0.669948
	RG7112 - Disc 4	0.914817	0.686936	0.520185	0.586554	0.573404	0.426305	0.107423	0.345231	0.788084	0.25977	0.584754	0.292541	0.393667	0.133302	0.0617169	0.448164	0.400924	0.508744	0.500594
	Log 2 ( Fold change pre/post-Discs)
	Samples	VEGF-A	CCL26	CXCL1	CCL11	CCL7	CCL24	CXCL5	CXCL9	CXCL10	IL-8	Angiogenin	IL1-alpha	CX3CL1	CCL5	IL-6	CXCL11	TNF-alpha	IFN-gamma	IL1-beta
	CTRL - Disc 1	0.845765	0.016594	2.51826	2.21217	1.31251	4.0325	0.39703	1.16784	-0.274876	0.0771131	0.543419	0.740721	0.457512	0.0217656	1.79089	0.56308	1.36481	0.406127	-0.0309348
	CTRL - Disc 2	2.20197	0.477225	0.944808	2.39276	0.665764	2.84684	0.742069	2.54173	-3.72629	0.36545	-0.0952774	0.35547	0.333372	0.77958	1.1514	0.109858	-0.0679817	0.35797	1.87662
	CTRL - Disc 3	0.0718271	-0.00275024	2.17426	0.758063	0.0372739	1.01761	0.779432	1.67602	-0.632306	0.297058	0.831106	0.423868	0.287105	0.232445	1.29344	0.0969748	0.252943	0.506927	0.0833154
	CTRL - Disc 4	0.294934	0.178318	2.57663	0.626773	0.845415	1.22819	1.0909	1.35407	0.718752	3.37578	0.858754	2.02862	1.47557	1.95604	5.31643	1.2746	1.41462	0.86083	2.2414
	O-Vanillin - Disc 1	-0.423919	-0.378692	-1.64489	-2.46762	-1.06218	-3.15882	-0.0442599	-1.50474	-1.02	-0.265192	-0.224275	-0.531943	-0.161254	0.0961958	-1.30312	-0.24236	-0.964208	-0.572503	-0.310185
	O-Vanillin - Disc 2	-0.370676	-0.263532	-1.19053	-1.27445	-0.468305	-2.03299	-2.00314	-1.12205	-1.25612	-0.971481	-0.266855	-0.384738	-0.395069	-0.889378	-0.893674	-0.116218	-0.121026	-0.35592	-2.94617
	O-Vanillin - Disc 3	-0.0251334	-0.135179	-1.08255	-0.948197	-0.0414454	-1.11147	-1.32885	-1.18998	-0.671354	-0.376422	-0.589275	0.157518	-0.0363666	0.103008	-1.00781	-0.0547637	-0.203683	-0.286941	-0.649008
	O-Vanillin - Disc 4	-0.20348	-1.05484	-1.06023	-0.360528	-0.686366	-1.85422	-2.76844	-1.78598	-0.89542	-1.75428	-0.640702	-1.61881	-1.27939	-1.24726	-2.76998	-1.14372	-1.30852	-0.801079	-0.208396
	RG7112 - Disc 1	-1.926	-1.79387	-1.25475	-1.53216	-0.431992	-2.20916	-3.46034	-1.39008	-0.249039	3.20815	-0.319601	-1.58422	-1.5697	-1.32834	-2.05174	-1.7756	-1.08302	-1.05305	-2.96755
	RG7112 - Disc 2	-2.51343	0.498877	-0.738149	-0.490938	-0.645202	-0.998334	-0.198612	-1.03472	-1.10604	-0.928782	-0.326851	-0.22931	-0.187998	-0.765626	-0.196156	0.390644	-0.790755	-1.4035	-1.06922
	RG7112 - Disc 3	-0.259549	-0.657752	-0.581325	-0.846317	-0.118317	-0.715021	-2.09728	-0.839498	-0.215139	-0.886966	-0.425151	-0.18567	-0.280104	-0.0950457	-0.977232	-0.392308	-0.378228	-0.166376	-0.577879
	RG7112 - Disc 4	-0.128444	-0.541753	-0.942902	-0.769664	-0.802376	-1.23004	-3.21863	-1.53437	-0.343578	-1.94469	-0.774098	-1.77329	-1.34495	-2.90723	-4.01819	-1.1579	-1.3186	-0.974989	-0.998288

## Sheet: Figure 5D
	Samples	TNF-alpha	IFN-gamma	VEGF-A	CCL11	CCL24	CXCL1	CXCL9	CXCL10	Angiogenin
	CTRL- Disc 1 -PRE	4.69591	0.923885	11922.7	4.53203	35.7326	87.3381	124.888	291.861	30.5437
	CTRL- Disc 2 -PRE	10.6366	1.07353	5090.48	4.82606	16.8629	99.1544	14.1191	78.0534	50.8915
	CTRL- Disc 3 -PRE	10.149	1.07353	19676.3	11.3512	255.478	110.575	38.1012	161.488	22.1518
	CTRL- Disc 4-PRE	6.7	0.923885	24236.5	7.40952	109.984	120.27	64.6286	159.505	30.7063
	CTRL- Disc 1 -POST	12.094	1.22426	21427.7	21.0001	584.746	500.352	280.591	241.23	44.5151
	CTRL- Disc 2 -POST	10.147	1.37586	23421.6	25.3446	121.316	190.866	82.2139	5.89748	47.6391
	CTRL- Disc 3 -POST	12.094	1.52551	20680.7	19.1973	517.232	499.086	121.751	104.183	39.4091
	CTRL- Disc 4-POST	17.8615	1.67785	29734	11.4411	257.663	717.464	165.211	262.507	55.6851
	O-Vanillin - Disc 1-PRE	11.1242	1.37391	21836.4	22.8405	235.777	424.739	247.437	262.094	43.6267
	O-Vanillin - Disc 2-PRE	12.0956	1.37391	22114.1	11.6737	67.887	263.773	36.0809	23.6284	54.0109
	O-Vanillin - Disc 3-PRE	11.1242	1.67624	19711.5	19.1671	421.683	354.904	58.0888	81.4223	40.6641
	O-Vanillin - Disc 4-PRE	19.0515	2.13316	35546.7	6.92628	205.729	212.41	257.272	299.336	51.544
	O-Vanillin - Disc 1-POST	5.7018	0.923885	16276.8	4.12931	26.3999	135.819	87.1956	129.243	37.3455
	O-Vanillin - Disc 2-POST	11.1223	1.07353	17103.5	4.82571	16.5881	115.57	16.5771	9.89247	44.89
	O-Vanillin - Disc 3-POST	9.65946	1.37391	19371.1	9.93392	195.164	167.584	25.4608	51.1265	27.0285
	O-Vanillin - Disc 4-POST	7.69177	1.22426	30870.7	5.39474	56.901	101.862	74.6037	160.92	33.0604
	RG7112- Disc 1-PRE	6.7	0.998558	23975.2	5.20665	69.1248	195.382	283.043	435.219	51.6749
	RG7112- Disc 2-PRE	17.1346	2.44781	29397.5	18.7366	94.2109	337.24	68.0761	57.2954	54.0558
	RG7112- Disc 3-PRE	10.6366	1.37391	17775.1	17.1111	373.397	276.988	69.1646	118.663	43.9421
	RG7112- Disc 4-PRE	15.4709	1.52464	30518.5	11.3331	270.132	237.888	193.643	177.437	57.1763
	RG7112- Disc 1-POST	3.16267	0.481255	6309.28	1.80025	14.9489	81.8781	107.993	366.218	41.4066
	RG7112- Disc 2-POST	9.90452	0.925299	5148.63	13.3322	47.1599	202.178	33.2288	26.6176	43.0974
	RG7112- Disc 3-POST	8.18362	1.22426	14848.4	9.51726	227.472	185.125	38.6518	102.224	32.7264
	RG7112- Disc 4-POST	6.20264	0.77565	27918.8	6.6475	115.159	123.746	66.8517	139.835	33.4341
