# Supplementary material for: Senotherapeutic drugs for human intervertebral disc degeneration and low back pain
Source: eLife. 2020 Aug 21;9:e54693. doi: 10.7554/eLife.54693 (PMC7442487; doi:10.7554/eLife.54693)
Supplement: Supplementary file 1. [file elife-54693-supp1.xlsx]

## Sheet: plate layout
Supplementary File 1. Genes names (aliases) and primers.
Part Number	4331182
Product Type	Taqman(R) Gene Expression Assays
Plate Type	96-position tube rack v1
Plate ID	1791043
Assay ID	Lot Number	Vial ID	Well Location	Context Sequence	Category ID	Group	Group ID	Gene Symbol	Gene Name	Chromosome	Species	NCBI Gene Reference
Hs99999901_s1	1781612	341080658	A01	CCATTGGAGGGCAAGTCTGGTGCCA	MOL1980000	Miscellaneous function	1980000000	18S	Eukaryotic 18S rRNA	21	Homo sapiens	,X03205.1
Hs01104728_m1	1777588	331941445	A02	GCGAGCATGTTGGCAGTGGAATCCC	GO:0004715	Protein kinase activity	GO:0004672	ABL1	ABL proto-oncogene 1, non-receptor tyrosine kinase	9	Homo sapiens	NM_007313.2,NM_005157.5,AB209642.1,JX565025.1,JX565024.1,BC117451.1,X16416.1,JF272500.1,AB209456.1,M14752.1
Hs00178289_m1	1774549	331906968	A03	CTCCTGAGGAGCGGGAGGAGTGGAC	MOL1980000	Miscellaneous function	1980000000	AKT1	AKT serine/threonine kinase 1	14	Homo sapiens	NM_005163.2,NM_001014431.1,NM_001014432.1,XM_017021076.1,XM_017021077.1,XM_017021078.1,XM_017021075.1,XM_005267401.1,KU177899.1,X61037.1,AK122894.1,AK314256.1,AB451367.1,BC000479.2,KU177898.1,M63167.1
Hs00167476_m1	1781582	341010531	A04	AGGAGATAAGCCCGACGTGGACAAG	MOL1980000	Miscellaneous function	1980000000	ALDH1A3	aldehyde dehydrogenase 1 family member A3	15	Homo sapiens	NM_000693.3,NM_001293815.1,U07919.1,BX538027.1,BC069274.1,AK312303.1,AK302607.1,AK303441.1,DB480234.1,AL110109.1
Hs01112355_g1	1550111	218140777	A05	GCTACAGAACGAAAGAAAGAAGTTG	MOL1980000	Miscellaneous function	1980000000	ATM	ATM serine/threonine kinase	11	Homo sapiens	NM_000051.3,XM_017017792.1,XM_006718843.3,XM_011542842.2,XM_011542843.2,XM_005271561.4,XM_005271562.4,XM_011542840.2,XM_011542844.2,XM_017017789.1,XM_017017790.1,XM_017017791.1,U33841.1,AB209133.1,BC0
Hs00995536_m1	1726196	309245265	A06	GCTGCTCTTTCCGGGATTTTTTATC	GO:0004842	Ubiquitin-protein transferase activity	GO:0004842	BMI1	BMI1 proto-oncogene, polycomb ring finger	10	Homo sapiens	NM_005180.8,BC011652.2,L13689.1,DB225488.1
Hs00189032_m1	1732158	319859516	A07	GCCTGGACCTCTGGCAGGTCAAGTC	GO:0005509	Binding	GO:0005488	CALR	calreticulin	19	Homo sapiens	NM_004343.3,BC007911.1,AY047586.1,CR457070.1,FJ224311.1,AK304492.1,BT007448.1,BC107102.2,BC020493.1,AB451408.1,AK295230.1,BC002500.2,M32294.1,M84739.1,AK223060.1
Hs00996788_m1	1773853	331898819	A08	CGGGACAAAGCTGGCCTGAATCATT	GO:0019209	Kinase regulator activity	GO:0019207	CCNA2	cyclin A2	4	Homo sapiens	NM_001237.3,BC104783.1,AK291931.1,AW276578.1,X51688.1,CR407692.1,BC104787.1
Hs01030099_m1	1788459	346671909	A09	CTGAGCCTATTTTGGTTGATACTGC	GO:0019209	Kinase regulator activity	GO:0019207	CCNB1	cyclin B1	5	Homo sapiens	NM_031966.3,AM851053.1,M25753.1,BC006510.2,BT020128.1
Hs00765553_m1	1782034	341043909	A10	CTCTGTGCCACAGATGTGAAGTTCA	GO:0019209	Kinase regulator activity	GO:0019207	CCND1	cyclin D1	11	Homo sapiens	NM_053056.2,BT019844.1,BC025302.1,M73554.1,BT019845.1,AK299044.1,M74092.1,BC001501.2,CR542099.1,AK313136.1,CR536538.1,X59798.1,BC023620.2,BC000076.2,BC014078.2
Hs01026536_m1	1767090	309526245	A11	GCTTGGATTTGCTGGACAAAGCCCG	GO:0019209	Kinase regulator activity	GO:0019207	CCNE1	cyclin E1	19	Homo sapiens	NM_001322261.1,NM_001322262.1,NM_001238.3,NM_001322259.1,XM_011527440.2,KF672848.1,AK291549.1,M74093.1,M73812.1,BC035498.2,KF672847.1,KR134287.1
Hs01075861_m1	1757579	244421605	A12	TCGAAGAAGGTGTGGGCAGAAGAAA	MOL1980000	Miscellaneous function	1980000000	CD44	CD44 molecule (Indian blood group)	11	Homo sapiens	N/A
Hs00156411_m1	1707924	309107036	B01	CAAGAAGCAAAGGTGAGCAGAAGTG	GO:0004721	Phosphatase activity	GO:0016791	CDC25C	cell division cycle 25C	5	Homo sapiens	NM_001287583.1,NM_022809.3,NM_001287582.1,NM_001318098.1,NM_001790.4,XM_011543762.1,XM_011543763.1,XM_005272145.3,XM_011543764.1,XM_011543759.2,XM_017010101.1,XM_006714739.3,XM_011543760.2,XM_01154376
Hs01548894_m1	1786705	346459806	B02	CCTCTTCCCCTCATCAAGAGCTATC	GO:0004715	Protein kinase activity	GO:0004672	CDK2	cyclin dependent kinase 2	12	Homo sapiens	NM_052827.3,NM_001798.4,NM_001290230.1,XM_011537732.1,AB012305.1,M68520.1,AK293246.1,AK291941.1,BC003065.2,BT006821.1,X61622.1,X62071.1,BJ991087.1
Hs01565683_g1	1603244	222260845	B03	CATCCCAATGTTGTCCGGCTGATGG	GO:0004715	Protein kinase activity	GO:0004672	CDK4	cyclin dependent kinase 4	12	Homo sapiens	NM_000075.3,M14505.1,BC005864.2,BC010153.2,Z48970.1,U79269.1,AK313701.1,BC015669.2,BI832658.1,CR542247.1,BC003644.2,CR407668.1
Hs01026371_m1	1776649	331920611	B04	CCCAACGTGGTCAGGTTGTTTGATG	GO:0004715	Protein kinase activity	GO:0004672	CDK6	cyclin dependent kinase 6	7	Homo sapiens	NM_001145306.1,NM_001259.6,XM_006715835.2,X66365.1,BC052264.1,AK313491.1
Hs01597588_m1	1666208	236417400	B05	AACGTAAACAGCTCGAATTAAGAAT	MOL1980000	Miscellaneous function	1980000000	CDKN1B	cyclin dependent kinase inhibitor 1B	12	Homo sapiens	NM_004064.4,BC001971.1,AY004255.1,AK298335.1
Hs00175938_m1	1723620	309215503	B06	TCTGATCTCCGATTTCTTCGCCAAG	GO:0019210	Kinase regulator activity	GO:0019207	CDKN1C	cyclin dependent kinase inhibitor 1C	11	Homo sapiens	NM_001122631.1,NM_001122630.1,NM_000076.2,XM_017017088.1,U22398.1,BC067842.1,EU570054.1
Hs00923894_m1	1779244	331918186	B07	AAGGTCCCTCAGACATCCCCGATTG	GO:0019210	Kinase regulator activity	GO:0019207	CDKN2A	cyclin dependent kinase inhibitor 2A	9	Homo sapiens	NM_000077.4,NM_058195.3,NM_058197.4,XM_011517679.1,XM_005251343.1,JQ694043.1,JQ694044.1,L27211.1,U26727.1,U38945.1,JQ694045.1,BC015960.2,BC021998.2,BQ012762.1,BI258230.1
Hs00793225_m1	1775646	331895105	B08	GAGGCGCGCGATCCAGGTCATGATG	GO:0019210	Kinase regulator activity	GO:0019207	CDKN2B	cyclin dependent kinase inhibitor 2B	9	Homo sapiens	NM_004936.3,BI560960.1,BC014469.1,JX391994.1,U17075.1,CR536529.1,JQ694048.1,JQ694046.1,JQ694047.1,L36844.1
Hs00176227_m1	1784066	344057025	B09	GAAGGACTGCGCTGCAGGTTATGAA	MOL1980000	Miscellaneous function	1980000000	CDKN2C	cyclin dependent kinase inhibitor 2C	1	Homo sapiens	NM_001262.2,NM_078626.2,AF041248.1,CR450289.1,BC016173.1,BC005041.1,AK091170.1,BC017036.1,BC000598.1,U17074.1
Hs00176481_m1	1721696	309169152	B10	ACGGCGCTGCAGGTCATGATGTTTG	GO:0019210	Kinase regulator activity	GO:0019207	CDKN2D	cyclin dependent kinase inhibitor 2D	19	Homo sapiens	NM_001800.3,NM_079421.2,BG719545.1,CR542158.1,BI669755.1,U40343.1,BC001822.2,U20498.1,U49399.1
Hs00967506_m1	1758771	309574798	B11	ATGCTCGCTGGAGAATTGCCATGGG	MOL1980000	Miscellaneous function	1980000000	CHEK1	checkpoint kinase 1	11	Homo sapiens	NM_001244846.1,NM_001114122.2,NM_001114121.2,NM_001274.5,NR_045204.1,NR_045205.1,XM_011542561.2,XM_011542560.2,XM_011542563.2,XM_011542562.2,XM_017017146.1,AK292549.1,AK293143.1,AB451345.1,JF289264.1,
Hs00200485_m1	1751048	331678079	B12	TTGTTTTGGAATTGATGGAAGGGGG	MOL1980000	Miscellaneous function	1980000000	CHEK2	checkpoint kinase 2	22	Homo sapiens	N/A
Hs01897804_s1	1753204	319945296	C01	TCGTCAGTGGCAAACATTTCACAGA	GO:0003712	Transcription factor activity, transcription factor binding	GO:0000989	CITED2	Cbp/p300 interacting transactivator with Glu/Asp rich carboxy-terminal domain 2	6	Homo sapiens	NM_006079.4,NM_001168389.2,NM_001168388.2,BC004377.1,AI087283.1,AA400897.1,AF109161.1,CF126189.1
Hs00164004_m1	1778235	331890647	C02	AAGACGAAGACATCCCACCAATCAC	MOL1980000	Miscellaneous function	1980000000	COL1A1	collagen type I alpha 1	17	Homo sapiens	NM_000088.3,XM_005257059.4,XM_005257058.3,XM_011524341.1,AB209597.1,Z74615.1,JQ236861.1,M36546.1,X07884.1,BC036531.2
Hs00943809_m1	1784288	344058092	C03	GAACTCAAGAGTGGAGAATACTGGG	MOL1980000	Miscellaneous function	1980000000	COL3A1	collagen type III alpha 1 chain	2	Homo sapiens	NM_000090.3,AK091853.1,X01742.1,BC028178.1,X14420.1,X06700.1
Hs00355412_m1	1504512	208637189	C04	ACTGTGACCAAGGTGAATGAAACAG	MOL1980000	Miscellaneous function	1980000000	CREG1	cellular repressor of E1A stimulated genes 1	1	Homo sapiens	NM_003851.2,AK315497.1,AK075375.1,AF084523.1,AK095456.1,AY359071.1,AK130006.1,BC008628.1,BC006786.1
Hs00153451_m1	1777690	331940573	C05	TCCAGTGGCTGGGCAGCCACACCAC	MOL1980000	Miscellaneous function	1980000000	E2F1	E2F transcription factor 1	20	Homo sapiens	NM_005225.2,BC050369.2,M96577.1,S49592.1,BC058902.1
Hs00605457_m1	1767708	309459527	C06	CCAATGGATGGGCTGCAGTCTGTCT	MOL1980000	Miscellaneous function	1980000000	E2F3	E2F transcription factor 3	6	Homo sapiens	NM_001243076.2,NM_001949.4,XM_005248866.4,XM_011514328.2,XM_011514324.2,XM_005248865.4,XM_017010330.1,CR749285.1,BC114554.1,Y10479.1
Hs00152928_m1	1734304	319951969	C07	TGACCGCAGAGTCTTTTCCTGACAT	MOL1980000	Miscellaneous function	1980000000	EGR1	early growth response 1	5	Homo sapiens	NM_001964.2,AK298101.1,KM114058.1,X52541.1,M62829.1,BC073983.1,AK301065.1,M80583.1
Hs00428293_m1	1780980	341052440	C08	CTGACCCAGATGAGGTGGCCAGGAG	MOL1980000	Miscellaneous function	1980000000	ETS1	ETS proto-oncogene 1, transcription factor	11	Homo sapiens	NM_001162422.1,NM_001143820.1,NM_005238.3,XM_011542651.1,XM_011542650.1,XM_011542649.2,XM_017017314.1,XM_017017315.1,XM_011542652.1,XM_017017316.1,XM_017017317.1,BT019453.1,X14798.1,BT019452.1,AK30140
Hs00232009_m1	1720850	241899768	C09	CTGGAGCAAATGATCAAAGAAAACC	MOL1980000	Miscellaneous function	1980000000	ETS2	ETS proto-oncogene 2, transcription factor	21	Homo sapiens	NM_005239.5,NM_001256295.1,XM_017028290.1,XM_005260935.1,BT006838.1,BC017040.1,AK096841.1,BC042954.2,J04102.1,AK315563.1
Hs00365052_m1	1777041	331884393	C10	ACCACATCGAGCGGATCTGGCCCCT	MOL1980000	Miscellaneous function	1980000000	FN1	fibronectin 1	2	Homo sapiens	N/A
Hs01035168_m1	1773992	331949732	C11	CACTTTGGAAAAGTTAAAGACAGTG	GO:0015925	Hydrolase activity, hydrolyzing o-glycosyl compounds	GO:0004553	GLB1	galactosidase beta 1	3	Homo sapiens	NM_001079811.2,NM_001317040.1,NM_000404.3,NM_001135602.2,M22590.1,AK300753.1,BT007147.1,M27508.1,M27507.1,M34423.1,AK223091.1,AK312988.1,AK222763.1,AK300021.1,AK298985.1,BC007493.2,AK130133.1
Hs01047719_m1	1775745	331877078	C12	AGCATGAAAGTTAGCAGAGACAAGG	MOL1980000	Miscellaneous function	1980000000	GSK3B	glycogen synthase kinase 3 beta	3	Homo sapiens	NM_002093.3,NM_001146156.1,XM_006713611.2,XM_006713610.2,BC000251.1,AB451356.1,CR536510.1,AK290897.1,L33801.1,EU302497.1,BC012760.2
Hs00978050_g1	1776292	331968171	D01	CATCCACCAGTACAGGGAGCAGATC	GO:0003924	hydrolase	GO:0016787	HRAS	HRas proto-oncogene, GTPase	11	Homo sapiens	NM_005343.3,NM_001318054.1,NM_001130442.2,NM_176795.4,BM801600.1,BM801632.1,AJ437024.1,CR542271.1,BC006499.2,BQ674260.1,AB451485.1,AB451336.1,BM808879.1,AF493916.1,BT019421.1,CR536579.1,KJ534868.1,BC0
Hs03676575_s1	1789155	346424688	D02	CCCAACGCGCCTCGCCGGATCTGAG	MOL1980000	Miscellaneous function	1980000000	ID1	inhibitor of DNA binding 1, HLH protein	20	Homo sapiens	NM_181353.2,NM_002165.3,BI768231.1,S78825.1,AI304595.1,BC012420.1,X77956.1,BC000613.2
Hs00989291_m1	1773613	331899827	D03	TAATTATTCGGTAACTGACTTGAAT	MOL1980000	Miscellaneous function	1980000000	IFNG	interferon gamma	12	Homo sapiens	NM_000619.2,AB451324.1,V00543.1,AM903379.1,AY255839.1,BC070256.1,AF506749.1,AY044154.1,X87308.1,X62470.1,X13274.1,AB451453.1,X62468.1,X62469.1,X01992.1,EF173872.1,X62474.1,AY255837.1,X62473.1,X62471.1
Hs01547656_m1	1769968	309424167	D04	TTATTTCAACAAGCCCACAGGGTAT	MOL1980000	Miscellaneous function	1980000000	IGF1	insulin like growth factor 1	12	Homo sapiens	NM_001111283.2,NM_001111284.1,NM_000618.4,XM_017019261.1,XM_017019262.1,XM_017019259.1,XM_017019260.1,XM_017019263.1,U40870.1,AL710591.1,AB209184.1,X56774.1,X56773.1,CR541861.1,X57025.1,M11568.1,BC152
Hs00609566_m1	1764604	309557443	D05	CCATCTTCGTGCCCAGACCTGAAAG	MOL1980000	Miscellaneous function	1980000000	IGF1R	insulin like growth factor 1 receptor	15	Homo sapiens	NM_000875.4,NM_001291858.1,XM_017022136.1,XM_011521517.2,XM_017022138.1,XM_017022137.1,XM_011521516.2,XM_017022139.1,X04434.1,BC143721.1,BC113610.1,BC113612.1,AB425196.1,EU826611.1
Hs00365742_g1	1623784	224590824	D06	GGGAGACAGAATATGGTCCCTGCCG	MOL1980000	Miscellaneous function	1980000000	IGFBP3	insulin like growth factor binding protein 3	7	Homo sapiens	NM_001013398.1,NM_000598.4,XM_017012152.1,AK092447.1,AK095991.1,BC018962.2,AK130884.1,AK075483.1,AK095408.1,AK097201.1,DQ884397.1,AK125224.1,M31159.1,BC000013.2,AK315668.1,X64875.1,DQ884396.1,AK127537
Hs00181213_m1	1774549	331908920	D07	GCAAGTCAAGATCGAGAGAGACTCC	MOL1980000	Miscellaneous function	1980000000	IGFBP5	insulin like growth factor binding protein 5	2	Homo sapiens	NM_000599.3,M62782.1,BC011453.1,CR456809.1,BT019706.1,BT019707.1,AF055033.1,M65062.1,AK314992.1
Hs00266026_m1	1768641	331831460	D08	GCACCTGCGAGCAAGGTCCTTCCAT	MOL1980000	Miscellaneous function	1980000000	IGFBP7	insulin like growth factor binding protein 7	4	Homo sapiens	NM_001253835.1,NM_001553.2,AF540057.1,L19182.1,S75725.1,BT006654.1,BC066339.1,AK316082.1,AK303915.1,BC017201.2
Hs01941057_u1	1477874	201309703	D09	GGTACTGTCCCAAGTGCCGGGGGGA	GO:0003682	Binding	GO:0005488	ING1	inhibitor of growth family member 1	13	Homo sapiens	NM_198218.2,NM_198217.2,NM_198219.2,NM_005537.5,NM_001267728.1,AB024401.1,AB024402.1,BC018348.1,BC093942.1,AF149723.1,BC093944.1,AF181849.1,AK302353.1,AF078835.1,AF181850.1,AB031269.1,AB037594.2,AF044
Hs01547283_m1	1788834	346424391	D10	GATGGTCAAGGTTGTGCCCACGTGC	MOL1980000	Miscellaneous function	1980000000	IRF3	interferon regulatory factor 3	19	Homo sapiens	NM_001197123.1,NM_001197122.1,NM_001197125.1,NM_001197124.1,NM_001197127.1,NM_001197126.1,NM_001571.5,NM_001197128.1,NR_045568.1,XM_017026766.1,XM_006723197.1,XM_006723198.1,XM_017026767.1,XM_00672320
Hs00158114_m1	1789155	346424099	D11	ACCATCTTCAAGGCCTGGGCCAAGG	MOL1980000	Miscellaneous function	1980000000	IRF5	interferon regulatory factor 5	7	Homo sapiens	N/A
Hs01014809_g1	1777364	331958610	D12	GTCCTGGTGAAGCTGGAACCCTGGC	MOL1980000	Miscellaneous function	1980000000	IRF7	interferon regulatory factor 7	11	Homo sapiens	XM_011520066.2,XM_017017674.1,NM_004029.2,NM_004031.2,NM_001572.3,XM_005252907.3,XM_005252906.3,XM_005252909.3,U73036.1,KC477210.1,U53831.1,AK303752.1,U53830.1,U53832.1,AF076494.1,BC136555.1
Hs00983247_g1	1720239	309382708	E01	AAGCAACTCATGGTTCATGCTTTTA	GO:0004871	Signal transducer activity	GO:0004871	MAP2K1	mitogen-activated protein kinase kinase 1	15	Homo sapiens	NM_002755.3,XM_017022411.1,XM_017022413.1,XM_017022412.1,XM_011521783.2,AK312356.1,BC139729.1,AK291500.1,L05624.1,AK294322.1,BC137459.1,L11284.1
Hs00177127_m1	1721163	309175752	E02	TGGAGCTGATGGAGCACCCCTTCTT	GO:0004871	Signal transducer activity	GO:0004871	MAP2K3	mitogen-activated protein kinase kinase 3	17	Homo sapiens	NM_001316332.1,NM_145109.2,NM_002756.4,XM_005256723.2,XM_011523959.1,XM_011523958.2,XM_017024859.1,XM_017024858.1,XM_017024857.1,L36719.1,CR541793.1,AK315505.1,CR536514.1,GQ225578.1,AB451349.1,AB45122
Hs00992389_m1	1788459	346671963	E03	TTACCTCACAGTGCTTAAAGAAGAA	GO:0004871	Signal transducer activity	GO:0004871	MAP2K6	mitogen-activated protein kinase kinase 6	17	Homo sapiens	NM_002758.3,XM_011525027.2,XM_011525026.2,XM_006721975.3,XM_011525025.2,XM_005257516.2,XM_005257515.2,U49732.1,X96757.1,AK290747.1,D87905.1,U39657.1,BC012009.1,U39064.1,AB451376.1,U39065.1,AB451252.1,
Hs00176247_m1	1782840	344002135	E04	TATGGCTCTGTGTGTGCTGCTTTTG	MOL1980000	Miscellaneous function	1980000000	MAPK14	mitogen-activated protein kinase 14	6	Homo sapiens	NM_139013.2,NM_139012.2,NM_001315.2,NM_139014.2,XM_017010300.1,XM_017010299.1,XM_017010302.1,XM_017010301.1,XM_017010304.1,XM_017010303.1,AK303414.1,CR536505.1,FJ032368.1,BC031574.1,BC000092.1,AF10054
Hs01066930_m1	1732636	320058716	E05	GAACAAGAGACCCTGGTTAGACCAA	GO:0003682	Binding	GO:0005488	MDM2	MDM2 proto-oncogene	12	Homo sapiens	N/A
Hs00899726_m1	1361050	165468846	E06	ATCCCTCGGATTAATGCTGAACTGT	MOL1980000	Miscellaneous function	1980000000	MORC3	MORC family CW-type zinc finger 3	21	Homo sapiens	NM_015358.2,NM_001320445.1,NM_001320446.1,XM_011529518.2,XM_017028311.1,XM_017028312.1,BC094779.1,AK292957.1,D50926.2,BC144116.1,BC007311.1,AK295133.1,BC132731.1
Hs00153408_m1	1782034	341044458	E07	CCAGCAGCGACTCTGAGGAGGAACA	MOL1980000	Miscellaneous function	1980000000	MYC	v-myc avian myelocytomatosis viral oncogene homolog	8	Homo sapiens	NM_002467.4,V00568.1,BT019768.1,AK303921.1,BC000917.2,K02276.1,BC000141.1,AK312883.1,BC058901.1
Hs01039836_m1	1522888	213917299	E08	CAGGAAATGGAGGTACAAAATCAAC	GO:0003684	Dna binding	GO:0003677	NBN	nibrin	8	Homo sapiens	NM_001024688.2,NM_002485.4,XM_011517045.1,XM_017013461.1,XM_017013462.1,XM_017013460.1,BX640816.1,AF058696.2,BC136803.1,AK289848.1,AF051334.1,AK223256.1,BC136802.1,BC146797.1
Hs00765730_m1	1784288	344057890	E09	ACAACTATGAGGTCTCTGGGGGTAC	GO:0003682	Binding	GO:0005488	NFKB1	nuclear factor kappa B subunit 1	4	Homo sapiens	NM_001165412.1,NM_003998.3,NM_001319226.1,XM_011532006.2,XM_011532008.2,CR749522.1,BC051765.1,AK122850.1,BC033210.1,AK291450.1,M58603.1,M55643.1
Hs00418356_m1	1734716	319990027	E10	TTTTCTCAGGCGTGCATGTGGCTGC	MOL1980000	Miscellaneous function	1980000000	NOX4	NADPH oxidase 4	11	Homo sapiens	NM_001143837.1,NM_001143836.2,NM_001291929.1,NM_001291926.1,NM_001291927.1,NM_016931.4,NM_001300995.1,XM_006718849.3,XM_017017841.1,XM_017017843.1,XM_017017844.1,XM_011542857.2,AK298357.1,AJ704726.1,A
Hs00427214_g1	1782034	341043963	E11	TTTGAAGCACCAAACCAGGAGAAAG	GO:0030337	Enzyme regulator activity	GO:0030234	PCNA	proliferating cell nuclear antigen	20	Homo sapiens	NM_002592.2,NM_182649.1,M15796.1,BC062439.1,AK313286.1,CR536501.1,BC000491.2,CR541799.1
Hs00907957_m1	1779872	331936666	E12	GAGAATTTGAGAGGTTTCAGGAGAT	MOL1980000	Miscellaneous function	1980000000	PIK3CA	phosphatidylinositol-4,5-bisphosphate 3-kinase catalytic subunit alpha	3	Homo sapiens	NM_006218.3,XM_011512894.2,XM_006713658.3,U79143.1,Z29090.1,BC113603.1,AK292940.1,BX437219.2,AB210020.1,BC113601.1,AK297203.1
Hs01547054_m1	1782654	344005426	F01	AACGACATTGCCTTGCTGAAGATCC	GO:0008236	Peptidase activity	GO:0008233	PLAU	plasminogen activator, urokinase	10	Homo sapiens	NM_001319191.1,NM_002658.4,NM_001145031.2,XM_011539866.2,A35395.1,D11143.1,AB208961.1,BT007391.1,BC013575.2,X02760.1,AK298560.1,D00244.1,AY820134.1,M15476.1,AK312960.1,A18397.1,AK297940.1
Hs01090047_m1	1788459	346702507	F02	CATCCTGGAGAAGCTCTTTGAAAGG	MOL1980000	Miscellaneous function	1980000000	PRKCD	protein kinase C delta	3	Homo sapiens	NM_001316327.1,NM_212539.1,NM_006254.3,XM_006713259.2,XM_006713257.3,XM_017006855.1,XM_017006856.1,AK294272.1,BC043350.1,AK313216.1,BE048101.1,L07861.1,L07860.1,AK130150.1,D10495.1
Hs02621230_s1	1785067	341327893	F03	ATGCTGCACAGAAATTTTCAATTTG	GO:0004721	Phosphatase activity	GO:0016791	PTEN	phosphatase and tensin homolog	10	Homo sapiens	NM_000314.6,NM_001304718.1,NM_001304717.2,AA017584.1
Hs01078066_m1	1775745	331876773	F04	GACTCCAAGATCAAGAATCTTAGTA	MOL1980000	Miscellaneous function	1980000000	RB1	RB transcriptional corepressor 1	13	Homo sapiens	NM_000321.2,XM_011535171.2,M28419.1,L41870.1,AK299179.1,M33647.1,BC039060.1,M15400.1,AK300284.1,AK291258.1,AB208788.1,BC040540.1
Hs00765700_m1	1722719	309264294	F05	CGAAGAGATATGCAACCATTGTCTC	MOL1980000	Miscellaneous function	1980000000	RBL1	RB transcriptional corepressor like 1	20	Homo sapiens	NM_001323281.1,NM_001323282.1,NM_183404.3,NM_002895.4,XM_011528955.2,XM_006723842.2,XM_011528958.2,XM_017027992.1,BC032247.1,M74547.1,L14812.1,AK290380.1,AK308096.1
Hs00180562_m1	1785310	341324575	F06	TTTGACAAGTCCAAAGCACTTAGAA	MOL1980000	Miscellaneous function	1980000000	RBL2	RB transcriptional corepressor like 2	16	Homo sapiens	NM_001323608.1,NM_001323609.1,NM_001323610.1,NM_001323611.1,NM_005611.3,XM_017023513.1,XM_011523253.2,AK304283.1,AK300047.1,AK307881.1,BC034490.1,BX537767.1,S67171.1,X76061.1,X74594.1
Hs01010736_m1	1782840	344002409	F07	GATTTTGCAGGCACAAGCTGCAGAT	GO:0004867	Peptidase inhibitor activity	GO:0030414	SERPINB2	serpin family B member 2	18	Homo sapiens	NM_002575.2,NM_001143818.1,A21238.1,AK313159.1,Y00630.1,J02685.1,J03603.1,BC012609.1,M18082.1,A32415.1,DQ656059.2
Hs01126606_m1	1789868	346645655	F08	TCATCCACAGCTGTCATAGTCTCAG	GO:0004867	Peptidase inhibitor activity	GO:0030414	SERPINE1	serpin family E member 1	7	Homo sapiens	NM_000602.4,X04429.1,AK316225.1,X04744.1,BC010860.1,M16006.1,AK297728.1,M14083.1,CN309038.1,AK293248.1,X12701.1
Hs01009005_m1	1743886	323461960	F09	ACTAATTCCAAGTTCCATACCCCAT	GO:0019213	hydrolase	GO:0016787	SIRT1	sirtuin 1	10	Homo sapiens	NM_001314049.1,NM_012238.4,NM_001142498.1,AK074805.1,AK289743.1,JQ768366.1,BX648554.1,AL136741.1,BC012499.1,AF235040.1,AK027686.1,AF083106.2
Hs00533490_m1	1763465	331825572	F10	TCATCAATTTCGAGCAGAAGGAAAG	MOL1980000	Miscellaneous function	1980000000	SOD1	superoxide dismutase 1, soluble	21	Homo sapiens	NM_000454.4,BT006676.1,AK312116.1,CR450355.1,BC001034.1,AV756797.1,AY450286.1,X02317.1,CR541742.1,AY049787.1,EF151142.1,EU794661.1
Hs00167309_m1	1785067	341327480	F11	GGAACAACAGGCCTTATTCCACTGC	MOL1980000	Miscellaneous function	1980000000	SOD2	superoxide dismutase 2, mitochondrial	6	Homo sapiens	NM_001322817.1,NM_001024466.2,NM_001024465.2,NM_001322819.1,NM_001322820.1,NM_001322814.1,NM_000636.3,BC012423.1,X15132.1,AK296809.1,BU741675.1,AK097395.1,Y00985.1,M36693.1,AY280720.1,BM994509.1,BT006
Hs00234160_m1	1764604	309556920	F12	CGGGCCTTGCAAATACATCCCCCCT	MOL1980000	Miscellaneous function	1980000000	SPARC	secreted protein acidic and cysteine rich	5	Homo sapiens	NM_003118.3,NM_001309443.1,NM_001309444.1,AK096969.1,BC004974.1,BI602719.1,Y00755.1,J03040.1,AL540785.3,BC072457.1,CR456799.1,BC008011.1,AL541830.3,AK299441.1
Hs00911929_m1	1740718	323564975	G01	TGACAAGATCACACAGCTGAAGATC	MOL1980000	Miscellaneous function	1980000000	TBX2	T-box 2	17	Homo sapiens	NM_005994.3,XM_011525159.1,BC070054.1,AB209378.1,U28049.1,AL832900.1,BC052566.1
Hs00195612_m1	1781612	341079894	G02	CCAAGTCGGGAAGGCGAATGTTTCC	MOL1980000	Miscellaneous function	1980000000	TBX3	T-box 3	12	Homo sapiens	NM_005996.3,NM_016569.3,BC025258.1,AF170708.2,AF002228.1,AK304639.1,AF216750.1,AK054604.1
Hs00194619_m1	1674364	229958267	G03	TCCTCACGATGGCCAAAAAGGCTTT	GO:0003690	Dna binding	GO:0003677	TERF2	telomeric repeat binding factor 2	16	Homo sapiens	NM_005652.4,XM_005256123.3,U95970.1,AF002999.1
Hs00972656_m1	1788834	346424383	G04	GATTCGGCGGGACGGGCTGCTCCTG	GO:0003964	Transferase activity	GO:0016740	TERT	telomerase reverse transcriptase	5	Homo sapiens	NM_001193376.1,NM_198253.2,XM_017009796.1,AF018167.1,AX810378.1,AB085628.1,AF015950.1,AB086379.1,BC062321.1,AX810036.1,JF896283.1,AB086950.1
Hs00998133_m1	1778213	331965041	G05	AGTACAGCAAGGTCCTGGCCCTGTA	GO:0005160	Cytokine receptor binding	GO:0005126	TGFB1	transforming growth factor beta 1	19	Homo sapiens	NM_000660.5,XM_011527242.1,BC001180.1,BT007245.1,BC000125.1,AK291907.1,AI304490.1,M38449.1,BC022242.1,X02812.1
Hs00210887_m1	1721516	309314240	G06	GGGCAAGTGGTGACGGCTCTGGGCC	GO:0005200	Structural molecule activity	GO:0005198	TGFB1I1	transforming growth factor beta 1 induced transcript 1	16	Homo sapiens	NM_001042454.2,NM_001164719.1,NM_015927.4,BC001830.2,BC001507.3,AB007836.1,BC032545.1,AK313327.1,BC017288.2,AF116343.1
Hs00962908_m1	1758298	309579353	G07	ACACAATCCGGATCAGCTGGACTCT	MOL1980000	Miscellaneous function	1980000000	THBS1	thrombospondin 1	15	Homo sapiens	NM_003246.3,XM_011521971.1,BC136470.1,X04665.1,AB209912.1,AK310820.1,AK291639.1,X14787.1,BC136469.1,AK304754.1
Hs01034249_m1	1781725	341044878	G08	GCTCACTCCAGCCACCTGAAGTCCA	GO:0003682	Binding	GO:0005488	TP53	tumor protein p53	17	Homo sapiens	NM_001126117.1,NM_001276695.1,NM_001126113.2,NM_001126115.1,NM_001276699.1,NM_001126118.1,NM_001276698.1,NM_001126116.1,NM_001126112.2,NM_001276761.1,NM_001126114.2,NM_001276697.1,NM_001276696.1,NM_00
Hs00996818_m1	1713063	309089437	G09	AGTGAAGAAGAGGAGGAATTTTTGG	MOL1980000	Miscellaneous function	1980000000	TP53BP1	tumor protein p53 binding protein 1	15	Homo sapiens	NM_005657.2,NM_001141979.1,NM_001141980.1,XM_011521985.1,XM_017022533.1,U09477.1,AB210025.1,BX537418.1,BC112161.1,AK123418.1,AF078776.1
Hs01675818_s1	1764604	309557773	G10	CCATGTCCGCGTCCCACTAGCAGGC	MOL1980000	Miscellaneous function	1980000000	TWIST1	twist family bHLH transcription factor 1	7	Homo sapiens	NM_000474.3,XM_011515496.1,X99268.1,BC036704.2
Hs00185584_m1	1763308	309503314	G11	CTCCGGGAGAAATTGCAGGAGGAGA	GO:0005200	Structural molecule activity	GO:0005198	VIM	vimentin	10	Homo sapiens	NM_003380.3,XM_006717500.1,EU794672.1,BC066956.1,BC030573.2,AK098444.1,AK091813.1,M25246.1,AK290643.1,KU178388.1,X56134.1,AK222482.1,Z19554.2,AK222507.1,KU178389.1,AF328728.1,BC000163.2,AK056766.1,AK2
Hs99999905_m1	1773146	331837684	G12	GGGCGCCTGGTCACCAGGGCTGCTT	MOL1980000	Miscellaneous function	1980000000	GAPDH	glyceraldehyde-3-phosphate dehydrogenase	12	Homo sapiens	NM_002046.5,NM_001289746.1,EU668321.1,X53778.1,AY007133.1,BC001601.1,BU155402.1,BC029618.1,BC026907.1,BC004109.2,BC013310.2,BC025925.1,AB062273.1,AK026525.1,BC083511.1,BC020308.1,AK308198.1,AF261085.1
Hs00942496_s1	1735178	323539706	H01	TTCCTACGGGCTTGTTGCTGTTGAT	MOL1980000	Miscellaneous function	1980000000	CEBPB	CCAAT/enhancer binding protein beta	20	Homo sapiens	NM_001285878.1,NM_001285879.1,NM_005194.3,BU753628.1,BC005132.2,AF289608.1,BC021931.1,AW025406.1,BC007538.1
Hs00174131_m1	1781612	341081352	H02	TCAATGAGGAGACTTGCCTGGTGAA	MOL1980000	Miscellaneous function	1980000000	IL6	interleukin 6	7	Homo sapiens	XM_005249745.4,NM_001318095.1,NM_000600.4,XM_011515390.2,CR450296.1,X04403.1,AK301141.1,AK298013.1,BT019748.1,M29150.1,BT019749.1,CD013918.1,X04602.1,M14584.1,M18403.1,S56892.1,A09363.1,X04430.1,M5489
Hs04986394_s1	1775376	331907233	H03	GGAGGAGCTCTTCAGGGACGGGGTG	MOL1980000	Miscellaneous function	1980000000	BCL2	BCL2, apoptosis regulator	18	Homo sapiens	NM_000657.2,NM_000633.2,XM_011526135.2,XM_017025917.1,AI401297.1,EU287875.1,BC027258.1,M14745.1,M13994.1,M13995.1,X06487.1
Hs00236329_m1	1771212	331858018	H04	GAACGGCGGCTGGGATACTTTTGTG	MOL1980000	Miscellaneous function	1980000000	BCL2L1	BCL2 like 1	20	Homo sapiens	NM_001317921.1,NM_138578.2,NM_001322239.1,NM_001322240.1,NM_001322242.1,NM_001317919.1,NM_001317920.1,XM_017027993.1,XM_011528964.2,Z23115.1,BC019307.1,KU177938.1,DR156871.1,CR936637.1,BT007208.1,BX35
Hs00187848_m1	1786492	343951887	H05	CAGTGGGGGCTGGGCGGAGTTCACA	MOL1980000	Miscellaneous function	1980000000	BCL2L2	BCL2 like 2	14	Homo sapiens	NM_001199839.1,NM_004050.4,U59747.1,AK289519.1,BT019549.1,D87461.1,BC113522.1,BC021198.2,BC104789.1
Hs00177228_m1	1740718	323565209	H06	ATTGCCTTCCAGGTTAGGGCCTTTA	MOL1980000	Miscellaneous function	1980000000	ROS1	ROS proto-oncogene 1, receptor tyrosine kinase	6	Homo sapiens	NM_002944.2,XM_011536052.2,XM_017011172.1,XM_011536051.2,XM_011536050.2,XM_011536049.2,XM_006715548.3,XM_017011173.1,XM_011536058.2,XM_011536057.2,XM_011536056.2,XM_011536055.2,XM_011536054.2,XM_01153
Hs00355782_m1	1780057	331852109	H07	GCAGACCAGCATGACAGATTTCTAC	GO:0019210	Kinase regulator activity	GO:0019207	CDKN1A	cyclin dependent kinase inhibitor 1A	6	Homo sapiens	NM_078467.2,NM_000389.4,NM_001291549.1,NM_001220777.1,NM_001220778.1,L47233.1,L25610.1,U09579.1,CR536533.1,DA582789.1,BT006719.1,BC013967.2,BC001935.1,L26165.1,BC000312.2,AB451422.1,BU193165.1,AB20988
Hs00983871_m1	1705130	309102264	H08	AAGAAGACACTTTTGGGGTATCCAT	MOL1980000	Miscellaneous function	1980000000	NTRK3	neurotrophic receptor tyrosine kinase 3	15	Homo sapiens	NM_001243101.1,NM_002530.3,NM_001320135.1,NM_001320134.1,NM_001007156.2,NM_001012338.2,XM_011521638.2,XM_017022243.1,XM_011521637.2,XM_017022242.1,XM_017022245.1,XM_017022244.1,XM_017022241.1,XM_01702
Hs01001580_m1	1782034	341044133	H09	CTGTTTTGGACCGGAGGCTGACCAG	MOL1980000	Miscellaneous function	1980000000	ERBB2	erb-b2 receptor tyrosine kinase 2	17	Homo sapiens	NM_001289938.1,NM_001289937.1,NM_001289936.1,NM_001005862.2,NM_004448.3,NR_110535.1,AK131568.1,AK313683.1,AK300321.1,KJ534964.1,X03363.1,BC167147.1,AK295195.1,AK296908.1,KJ534831.1,M11730.1,BC080193.1
Hs00153153_m1	1781725	341044739	H10	TACACACAGAAATGGCCTTGTGAAA	MOL1980000	Miscellaneous function	1980000000	HIF1A	hypoxia inducible factor 1 alpha subunit	14	Homo sapiens	NM_181054.2,NM_001243084.1,NM_001530.3,AF207601.1,U29165.1,AF207602.1,BX648795.1,BT009776.1,FJ790247.1,AK312397.1,AB500182.1,AF304431.1,AK304315.1,AK296876.1,AB733094.1,U22431.1,AK299551.1,AB073325.1,
Hs00743767_sH	1758517	309539556	H11	TATTGAAGTGTTCTGAGCTGTATCT	MOL1980000	Miscellaneous function	1980000000	HSP90AA1	heat shock protein 90 alpha family class A member 1	14	Homo sapiens	NM_005348.3,NM_001017963.2,XM_011536718.2,AK056446.1,GQ149083.1,BC000987.2,X15183.1,BC007989.2,BC023006.1,AK129557.1,AF028832.1,AJ890083.1,AJ890082.1
Hs00174092_m1	1781725	341038274	H12	GCTGCTGAAGGAGATGCCTGAGATA	MOL1980000	Miscellaneous function	1980000000	IL1A	interleukin 1 alpha	2	Homo sapiens	NM_000575.4,X56086.1,CR457414.1,AK314850.1,BT007014.1,X02531.1,BC013142.2,M15329.1,X02851.1
